# Supplementary material for: A High Density Consensus Genetic Map of Tetraploid Cotton That Integrates Multiple Component Maps through Molecular Marker Redundancy Check
Source: PubMed Central journal article supplement (PMC3454346; doi:10.1371/journal.pone.0045739), 2012-09-24
Supplement: pone.0045739.s003.pdf [file pone.0045739.s003.pdf]

# c1

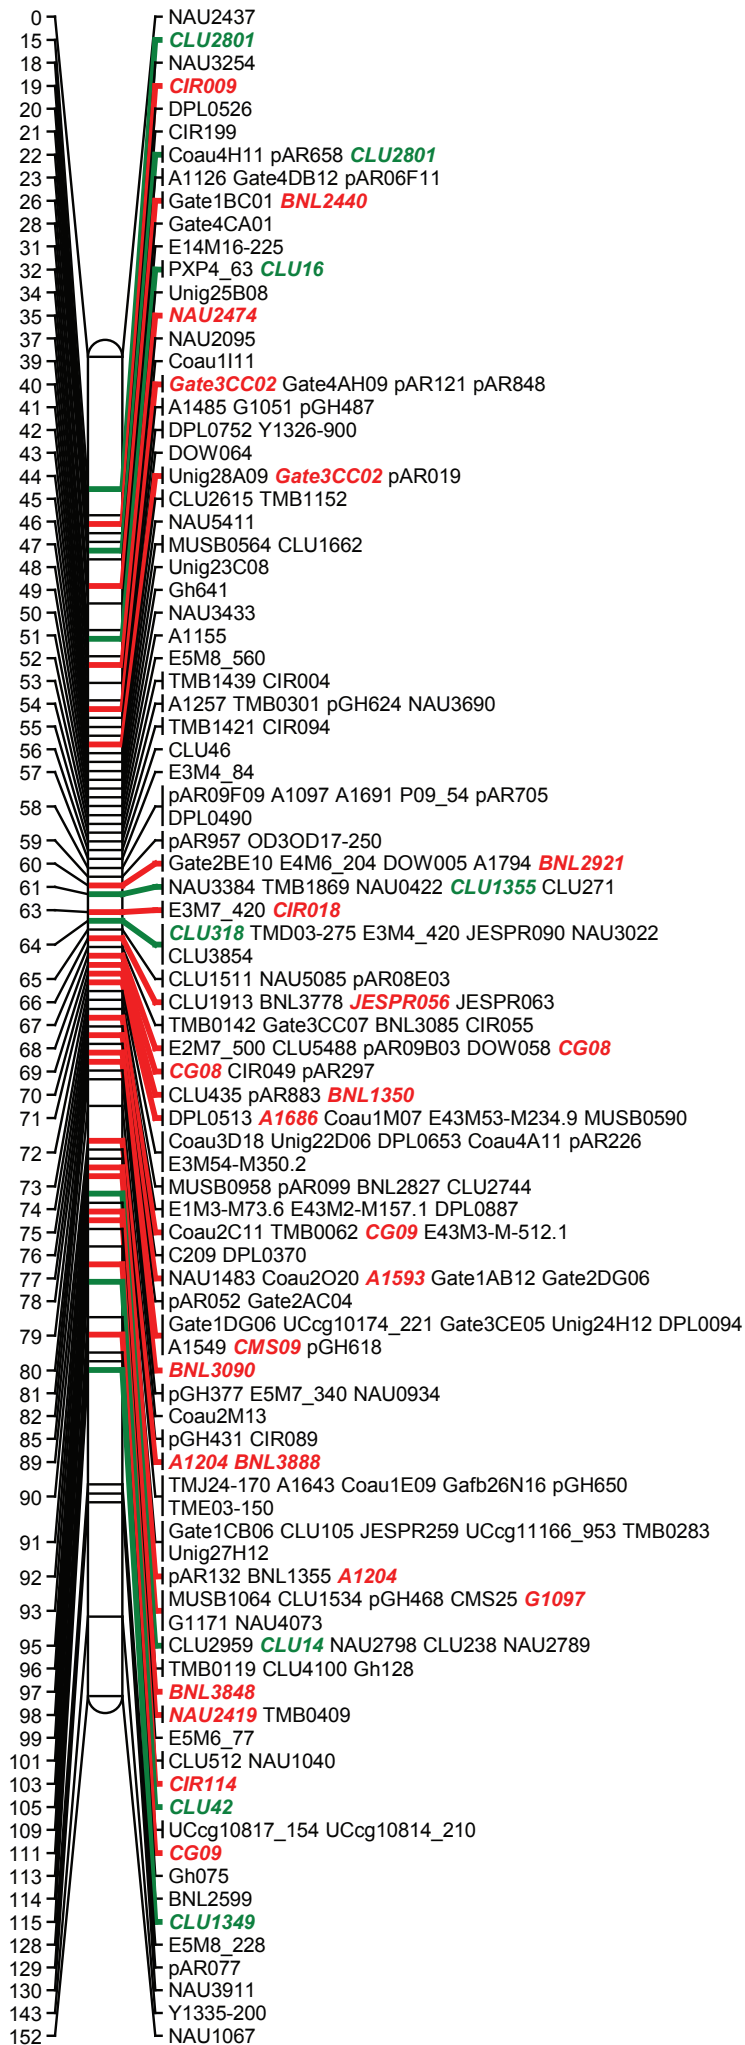

# C2

|     |                                                             |
|-----|-------------------------------------------------------------|
| 0   | E4M4_350                                                    |
| 2   | CLU4165                                                     |
| 3   | pAR09D10 HAU2001                                            |
| 5   | <b>BNL3424 NAU1246</b>                                      |
| 7   | <b>NAU3775</b>                                              |
| 8   | HNAU3419 UCcgs10034_277                                     |
| 9   | <b>CLU3518</b> NAU0895 <b>NAU2858</b>                       |
| 10  | CLU1474 CLU912                                              |
| 11  | HG1128 pAR01_54 pGH248                                      |
| 12  | CLU3571                                                     |
| 14  | E1M8_345                                                    |
| 15  | Unig25C09                                                   |
| 16  | <b>pAR851</b> TMB1580                                       |
| 17  | UCcot10066_547                                              |
| 18  | H E6M3_103 NAU2253                                          |
| 22  | <b>BNL0663 CLU108</b>                                       |
| 24  | <b>NAU3684</b>                                              |
| 26  | <b>JESPR304</b>                                             |
| 28  | E7M5_210                                                    |
| 30  | <b>CLU3430</b>                                              |
| 31  | Coau2G03                                                    |
| 32  | OD3GA19-205                                                 |
| 34  | H HAU2690 pAR316                                            |
| 39  | A1436 OD3OD17-185                                           |
| 40  | H UCcg10798_224 E2M4_226                                    |
| 41  | H NAU0854 DC1GA5-240                                        |
| 42  | CLU933                                                      |
| 43  | H E6M2_249 Unig27G05                                        |
| 45  | CLU1692 E2M8_74                                             |
| 47  | H E4M5_63 HAU0880                                           |
| 48  | H NAU1489 E3M5_103                                          |
| 49  | H OD3GA19-180 DOW066                                        |
| 50  | CLU579 E3M7_78                                              |
| 51  | <b>NAU3189</b> MGHES24 DC1SA21-380                          |
| 52  | H Coau4H19 Gate1CB05 E1M6_378 NAU2908 E8M1_420              |
| 53  | <b>DPL0568 NAU3485</b>                                      |
| 54  | H E7M6_214 E3M3_500 TMB1194 BNL1145                         |
| 55  | TMB2905 E3M8_470 me2em3-260 Gate3BA04                       |
| 56  | H E7M1_138 Coau1O15 TMK08-175 me4em1-220 E5M8_460           |
| 57  | NAU2817 E3M2_208                                            |
| 57  | MUSS114 CLU3544 E2M6_500 NAU6316 CLU2630                    |
| 58  | <b>NAU5134 MUSS073</b> SABPL01-170                          |
| 58  | BNL3523 <b>NAU3626</b> E2M6_224 <b>NAU3875</b> UCcg10798_80 |
| 58  | E31M2-M270.5 Unig27C04 E5M7_440                             |
| 59  | Unig24G02 <b>MUSB0958</b> CLU518 E2M6_420 pAR318            |
| 60  | MUSB1178 Y1340-900                                          |
| 60  | MUSB0399 <b>BNL3292</b> MUSB0888 Gafb13B07 Gate3CF08        |
| 60  | Gate4DE11 pAR701 pGH430 E1M2-M109.4                         |
| 61  | NAU6132 TMB1025 E43M54-M90.8 Gh198 A1146                    |
| 61  | pAR151 pAR499 pGH399                                        |
| 62  | MUSB0749 MUSB0194 <b>TMB0514</b> UCcg10587_240 DPL0216      |
| 62  | MUCS106 E41M1-M17.1                                         |
| 63  | E7M2_96 TMB0471 E1M2-M111.9 CG24                            |
| 63  | CLU32 E5M1_224 CLU1851 E3M3_156 E3M52-M276.3                |
| 64  | JESPR250 E43M54-M368.2 <b>BNL3971</b> CLU14 pGH549          |
| 64  | A1325 P02_35 Gate1CB08 Gate4AE09 Gate4BG11                  |
| 64  | <b>CIR401</b> Gafb15F06 Gate4BE02 Gate4CF02 G1148           |
| 64  | Unig06G11                                                   |
| 65  | Gate4AD09 pAR07F02 <b>pAR390</b> E2M5_134 CLU1510           |
| 65  | E2M6_370 E43M2-M249.3 E3M7_450 <b>CLU35</b> E5M8_630        |
| 65  | <b>JESPR101</b> E31M2-M290.0 E43M2-M159.0                   |
| 66  | <b>BNL3590</b> MUSB0915 CLU1378 <b>BNL2651</b> DPL0261      |
| 66  | MUSS294 <b>DPL0046</b>                                      |
| 67  | H HAU2643 HAU2923 MUSB0904 <b>BNL1410</b> UCcg10247_108     |
| 68  | CLU133 JESPR093 <b>DPL0674</b> CLU1731 <b>Gh669</b>         |
| 69  | H UCcot10111_542 UCcg10614_274 TMB1578                      |
| 70  | H Coau1M15 Gate1DA03 PXP4_65 <b>JESPR179 CLU108</b>         |
| 71  | CLU2817 NAU6623 E3M6_500                                    |
| 72  | <b>MUSB1017</b> CIR184                                      |
| 73  | pAR06B12 pAR10A02                                           |
| 75  | E1M54-M107.8                                                |
| 76  | NAU0437                                                     |
| 77  | H em6GA28-530 HAU1980                                       |
| 78  | H E8M13-90 <b>CLU39</b>                                     |
| 79  | HAU0296                                                     |
| 81  | <b>BNL1897</b> Y2300                                        |
| 82  | E5M6_252                                                    |
| 83  | E31M2-M87.2                                                 |
| 84  | <b>TMB2386</b>                                              |
| 85  | H Gate3BF06 Gate4BD11 Gate4CF10 <b>Unig25A02</b> NAU0456    |
| 87  | pAR451 E11M2-200                                            |
| 89  | H E1M6-180 <b>BNL1434</b>                                   |
| 90  | <b>pAR723</b>                                               |
| 93  | GW33-90                                                     |
| 94  | E3M1_164                                                    |
| 100 | H LXP06 CLU43                                               |
| 105 | <b>CIR381</b> Gate4AB01                                     |
| 106 | H NAU5499 Gafb25M09 JESPR156                                |
| 111 | Coau2I05                                                    |
| 112 | <b>CLU40</b> Unig23G06                                      |
| 113 | GhCPI                                                       |
| 117 | P05_32                                                      |
| 118 | Gate2AA09                                                   |
| 119 | Unig27H04                                                   |
| 122 | H Y1321-345 BNL2877                                         |
| 126 | <b>NAU3535</b>                                              |
| 128 | pAR01D05                                                    |
| 131 | pAR03_02                                                    |
| 134 | Coau4C21                                                    |

**c3**

- 0 - CLU3608
- 6 - HAU0883
- 8 - **CIR202**
- 9 - UCcot10137\_405
- 12 - TMB0836
- 14 - NAU2161
- 16 - CIR133 **JESPR107**
- 17 - HAU2024
- 18 - **NAU0862**
- 19 - CM129
- 20 - UCcg11306\_322
- 21 - **CIR228**
- 22 - UCcg11217\_636
- 23 - **JESPR231**
- 25 - CIR084 MGHE566
- 26 - CLU950
- 27 - pVNC163
- 28 - CLU749 CLU1282
- 30 - **BNL3259**
- 31 - CLU1010
- 32 - **Gh210** E7M1\_172
- 37 - pAR815
- 38 - At18
- 39 - CLU83 Gate1BF05
- 40 - CIR263
- 43 - NAU5035
- 44 - HAU2588 **G1164**
- 45 - **NAU0972** HAU2511 UCD289 NAU1070
- 47 - pXP3\_89 **CIR332 MUSS162** UCD235 NAU0998
- 48 - Coau1M05 G1129 PXP2\_60
- 48 - CLU2785 TMB1025 E41M1-M85.9 Gate3BF12 Gate3BG09
- 49 - **BNL4017** UCcg11090\_504 pAR764 Unig27E01 BNL1080
- 50 - **CIR245**
- 51 - Gate2CB02 E5M3\_320
- 51 - E31M2-M79.3 BNL0244 E4M8\_79 A1418
- 52 - **CLU52** NAU3573 **BNL3463** Gate4AB05 CLU4402
- 52 - BNL3034 NAU1068
- 53 - **DPL0605** Gate3BE09
- 54 - Coau1L18 UCcg10550\_118 Gate4AE05
- 55 - Coau4A15 P01\_18 **NAU1248** Coau1F16 Coau2E20
- 55 - Gate2CF04 P11\_28 PXP3\_28 pGH550
- 56 - PGH740 **BNL0226** pVNC021 MUSB0639
- 57 - UCcg10916\_67 **DPL0631**
- 58 - pAR387 pGH358
- 59 - A1449 Gate1BC04 BNL4034
- 60 - TMB1314
- 61 - **A1145**
- 62 - E8M5\_155 BNL0140 E43M53-M431.9
- 63 - **Gh129** E1M51-M247.7 A1788
- 64 - pAR110 DOW073
- 65 - CLU445 MUSB1220
- 66 - E8M1\_400 MUCS282
- 67 - Gate1AD01 Gate1AD08 Gate1BG03 Gate1DF03 pAR180
- 67 - pGH739 Unig22G01 **CLU1372**
- 68 - DOW100 **CLU1372** E7M4\_185 DPL0733 DPL0170
- 69 - BNL3398 UCcg10469\_98 A1474 E5M8\_87
- 70 - E5M3\_450 CMS17 P09\_53 pGH551
- 71 - E5M8\_143 E1M3-M160.9 TMB0564
- 72 - pAR04\_14 pAR071 pGH364 pVNC313 Gate2BD04
- 72 - Unig28F06
- 73 - UCD571 MUSB0611 E1M54-M109.8 E41M1-M452.7 Unig23D03
- 74 - CLU3291 MUSS425 Unig25A01 W07 E1M2\_450
- 74 - TMB0395
- 75 - TMB1174 DPL0734 CLU644
- 76 - Gate2BC05 TMB0605 CLU838 E5M4\_102 MUSB0444
- 76 - Unig26F10
- 77 - BNL3267 E43M2-M167.2 E6M5\_161 E31M53-M113.1 **DPL0901**
- 78 - NAU0884
- 78 - BNL3140 E7M6\_328 TMB0211 CLU1381 **BNL1059**
- 78 - **CLU2758** BNL3627 E2M7\_310 MUSB1101 MUSB0641
- 79 - CLU1139 NAU2929 gate2DG02 pAR879 **TMB2826**
- 79 - CLU2948 CG26 E31M2-M102.1 E5M1-M-532.8 CIR058
- 80 - **BNL3441** pAR050 **CLU52**
- 80 - A1171 Coau3B05 G34A3-3 **pAR172** pGH619
- 81 - PXP3\_44 NAU3671 M125 E3M5\_102 E2M6\_146
- 82 - Gate15O14 Unig22B04 UCcg10680\_162
- 82 - CLU1853 Gate2CD07
- 83 - CLU4319 UCcg10927\_755
- 84 - E3M7\_82
- 85 - Unig24B10 Unig24C11 TMB1898
- 86 - **BNL2443**
- 87 - E8M6\_185 BNL1379 **BNL2443**
- 88 - E5M8\_74
- 89 - Coau4A11
- 90 - MUSB0634 CG23
- 91 - HAU2860 E3M2\_110
- 92 - UCcg11135\_141 TMB2069
- 94 - **CLU2758**
- 96 - DPL0592 pAR149 Unig25D01 HAU0920
- 97 - JESPR303
- 99 - Gate4BC01 Gate4CD12 Unig06D07 JESPR056 **CIR030**
- 99 - UCD195 TMB1748 UCD277
- 100 - CLU1984
- 101 - A1182 pAR08E06 pAR185
- 102 - MUCS439
- 103 - Gh527 E5M1\_400
- 104 - DOW035
- 108 - Gate1CD08 Gate4BE01
- 110 - **BNL3408** Gate2AC01 **pGH639**
- 111 - CLU923 CIR347
- 112 - Gate1BD11 Unig26E06
- 113 - NAU5233 CLU1768 CLU1324
- 116 - Coau4H06
- 124 - A1748
- 126 - UCcot10105\_151
- 131 - NAU3172 Gate2AA08 Unig24B07
- 132 - **CLU511**
- 137 - Gate1AF02 pAR01\_56 Unig25G07
- 139 - Gate4DC11
- 140 - Gate4DG02 pAR476
- 145 - CLU4140
- 159 - CLU1778

# c4

|     |                                                                  |
|-----|------------------------------------------------------------------|
| 0   | CIR027                                                           |
| 1   | MUSB0264                                                         |
| 12  | CIR223                                                           |
| 14  | <b>BNL3089</b>                                                   |
| 17  | E4M5_236                                                         |
| 18  | UCcg11185_886 CLU4015                                            |
| 20  | CLU77 NAU3127                                                    |
| 21  | CLU3874 NAU3649                                                  |
| 22  | <b>NAU3592</b>                                                   |
| 25  | <b>DPL0573</b> E5M1-M84.6                                        |
| 26  | CIR249 Y1296 NAU3469                                             |
| 29  | NAU1577                                                          |
| 30  | BNL2821 BNL3994 UCcg11256_182                                    |
| 31  | UCcot10520_501                                                   |
| 32  | NAU2701                                                          |
| 33  | E3M4_210 E3M52-M293.9                                            |
| 34  | UCcg10883_389                                                    |
| 35  | <b>CLU86</b>                                                     |
| 36  | DOW071 BNL3255                                                   |
| 38  | <b>NAU2363</b>                                                   |
| 39  | CG24 CLU759                                                      |
| 40  | Gate2BA04 CLU229                                                 |
| 41  | A1591 Gate3DC07 E4M2_430 CG03                                    |
| 42  | <b>Gh124</b> E1M3_300                                            |
| 43  | E5M6_140 DOW038 E3M6_95 E10M15-100 HAU1332                       |
| 44  | BNL3835 E3M7_290 E6M8_102 pGH559 CIR291                          |
| 45  | E4M5_216 DPL0299                                                 |
| 45  | Coau1J18 pAR372 NAU0869 HAU3120 Gate2AD01                        |
| 45  | E1M54-M282.7 E1M6_150 E3M52-M62.4                                |
| 46  | pGH407 UCcg10896_208 E1M4-M195.4 CLU877 E1M3-M307.2              |
| 46  | E43M3-M84.9 E43M52-M97.2 BNL1167                                 |
| 47  | Unig28B06 E41M1-M125.2 E31M2-M165.1 UCcot10251_72 DPL0196        |
| 47  | TMB0809 Coau2I23 <b>BNL4047</b> pAR04B02                         |
| 48  | E43M2-M411.0 <b>DPL0273</b> UCcg10488_64 NAU2672 E1M8_246        |
| 48  | EM1OD22-80                                                       |
| 49  | Unig23G08 BNL1044 <b>CLU3465</b>                                 |
| 51  | MUSS027 A1214 Gate2CC08 DOW069                                   |
| 52  | A1667 A1717 pAR09F08 Y1184 E2M1_129                              |
| 52  | NAU3205 A1759                                                    |
| 53  | A1751 A1763 UCcg11310_419 UCcg11310_334 UCcot10213_226           |
| 53  | A1310 pAR571 Unig06C08 <b>CLU1338</b>                            |
| 54  | NAU0826 CLU3545 MUSB1050 Unig22C05 <b>BNL2939</b>                |
| 54  | E2M6_121 <b>CLU225</b> CLU267                                    |
| 55  | <b>NAU6626</b> TMB0446 Coau2K12 BNL1303 BNL2962                  |
| 56  | <b>CIR048</b> HAU1300                                            |
| 56  | Unig25D11 HAU3371 <b>NAU6672</b>                                 |
| 57  | UCcgs10021_229 <b>NAU2654</b> CLU829                             |
| 58  | pAR08A12 M76 NAU0762                                             |
| 58  | Gate4DD06 pAR10C12 UCcg11425_194 <b>DPL0667</b> pAR926           |
| 59  | Unig25D03 Coau4E22 pAR04_48 pAR219 pAR966                        |
| 59  | <b>A1543</b> Coau1M07 Gate2BF01 Unig06G05                        |
| 60  | A1638 Gate4AD10 Gate4AE10 P11_38 Gate3CE04                       |
| 60  | <b>A1543</b> Unig26D09 <b>NAU2363</b> Gate1DC01 <b>Unig27B06</b> |
| 60  | Unig28C06 Unig28H09 <b>CLU51</b>                                 |
| 61  | G1033                                                            |
| 62  | pAR043 pAR197 pAR986 <b>BNL0530</b> Gate4CA09                    |
| 62  | pAR450 <b>Unig27B06</b> Coau2I05                                 |
| 63  | Gate4AE08 pVNC058 EM1OD30-55 Gafb14K15 <b>A1172</b>              |
| 63  | pAR049 pGH857                                                    |
| 64  | Gate2CC07 Gate4CG05 Unig22D08 <b>Gh117</b>                       |
| 65  | Gate3DE03 Gate3BE01 Gate3BE09 <b>NAU3093</b>                     |
| 66  | pAR230 <b>BNL3433</b> Gate1BA05 Gate1CA01 Gate3BA08              |
| 66  | Gate1BB01 CLU864                                                 |
| 67  | <b>CLU140</b> E8M5_350                                           |
| 68  | Gate3DE01 CLU1486                                                |
| 69  | HAU2016 Unig06B07 Gate2BF04 TMB2011 <b>BNL4049</b>               |
| 70  | <b>Gate1AG03</b> G1045 TMB2483                                   |
| 71  | pAR380 pAR903 PXP4_58 <b>DPL0494</b>                             |
| 72  | Unig23B03                                                        |
| 73  | HAU0087 <b>HAU0086</b> CLU619 Gate3DG11 UCD216                   |
| 74  | <b>pAR138</b> pGH374 UCD120 UCD108 <b>CLU3843</b>                |
| 75  | HAU0036 <b>CLU743</b> DPL0451                                    |
| 76  | pGH286                                                           |
| 77  | NAU6116 Y1315-590 HAU0101                                        |
| 79  | <b>CIR122</b>                                                    |
| 80  | MUSB0117 CLU1341                                                 |
| 82  | <b>BNL2572</b> <b>Unig28D06</b> CIR381 pAR09A08 <b>Unig28D06</b> |
| 83  | IW15                                                             |
| 84  | NAU3868                                                          |
| 84  | CIR091                                                           |
| 85  | E2M5_74                                                          |
| 86  | Unig24C06 <b>NAU3791</b>                                         |
| 87  | <b>Gate1AG03</b> Gate1DG06 Gate4AC11                             |
| 88  | <b>NAU5236</b> MUSB1112                                          |
| 89  | <b>CLU3877</b>                                                   |
| 94  | <b>CIR218</b>                                                    |
| 95  | CLU1257                                                          |
| 96  | NAU1151                                                          |
| 100 | UCcg11329_228 TMB1648                                            |
| 111 | HAU0751                                                          |

c5

0 | CIR328  
1 | MUSS219  
2 | NAU3036  
3 | NAU0934  
4 | NAU0980  
5 | pAR01C07  
6 | HMUSB1316 Gate4AF11 E31M2-M87.8  
7 | pAR01C07  
8 | UCco110298\_138  
9 | Gate4DC01 pAR351 CLU3821 CLU4591  
10 | HGW16-270 Gate4CE05 UCcg10577\_373  
11 | A1662  
12 | HNAU3273 CLU90  
13 | HPXP3\_07 P1 Gh260  
14 | HNAU1151 Gate3DB06 HAU0042  
15 | Coau1M05  
16 | HBNL4030 TMB0770 Unig22C05  
17 | HCM65 JESPR050 CIR185  
18 | UCcg11343\_68 pAR08D12  
19 | HNAU6094 E31M53-M116.3 MUSB1035  
20 | HUnig22F03 BNL1038 CIR235 Gate1CB02  
21 | G1262  
22 | HJESPR065 Coau3F17 PXP4\_26 CLU1381  
23 | Gate1AB04 pAR023 E43M54-M316.4  
24 | UCcgs10046\_302  
25 | HPAR333 NAU3402 NAU6109 E4M5\_400  
26 | HCLU252 CIR393 A1691  
27 | HMUSB1051 DPL0837 CLU4031  
28 | HY1321-150 MUSB0592  
29 | HNAU1172 E14M2-315 CLU1691 E3M2-M198.8 E5M1\_148  
30 | Gate1BB07 BNL3241 E6M4\_192  
31 | HMTB1314 Coau2C01 ME8OD10-120 CLU167 JESPR184  
32 | DPL0810 Gate4AA07 P05\_02 Unig25E12 E5M1\_156  
33 | E3M52-M107.5 E31M53-M88.3 E5M2\_214 E5M5\_151 E3M7\_175  
34 | Gate3CC12  
35 | IE3M5\_312 BNL3995 E3M5\_142 Coau4K03 em6GA45-80  
36 | HNAU6494 NAU2376 Gate2B08 NAU6172  
37 | HJESPR042 NAU3824 Gate4DC12 NAU1003  
38 | Gh422 NAU2001 Gate4DF07 pAR042 pAR206  
39 | pGH272 HAU0006 NAU3138 A1459 A1483  
40 | A1535 G1053 Gate2CE06 Unig25D10 Unig26B02  
41 | MUSS530 NAU3569  
42 | HNAU6105 TMB0191 NAU4040 NAU2296 MUSB1035  
43 | DPL0622 UCcot10055\_1504 UCcot10055\_499 UCcot10322\_62  
44 | Y1808 CIR294 CLU2870 UCcot10128\_122 E1M4-M186.8  
45 | CLU2870 E43M53-M308.6 CIR301 E3M54-M195.4 E1M3-M517.0  
46 | UCcg111015\_199 E5M6\_303 TMB0653 CG12 UCcg10855\_353  
47 | HE6M1\_288 ESTS178 Gate1CH01 em6PM8-85  
48 | CG14 A1159 Coau1E03 pAR131  
49 | HEZM7\_96 me3em6-590 E7M5\_161  
50 | A1159 NAU1406  
51 | HESM5\_190 PXP1\_77 E6M3-300 CLU269  
52 | HY1334-350 E3M2\_268 MUSB0977  
53 | me2em3-180  
54 | JESPR171  
55 | NAU3498  
56 | HESM1\_225 Unig25F08  
57 | HDOW063 CLU62  
58 | NAU6672  
59 | HNBS535 E31M2-M188.5  
60 | HE6M9-120 CLU3832  
61 | HCLU3884 DOW099  
62 | HE1M4\_95 EM1GA11-160 CLU3894  
63 | NAU3096  
64 | HE43M3-M260.0 BNL0852 E43M2-M68.3 Coau2E04 UCcg11011\_77  
65 | HE7M15-120 JESPR204  
66 | NAU3529  
67 | HPXP2\_41 CLU165  
68 | HGate2CF11 NAU0792  
69 | EM2GA34-205  
70 | CG03  
71 | HESM1-M87.9 BNL0542  
72 | HG1025 E3M5\_298  
73 | UCcg11421\_108 UCcg11421\_583 NAU4111  
74 | NAU4107 A1701 Coau2H13  
75 | NAU4106 G1054 CLU194 M16\_117 pAR945  
76 | pXP5\_21 Gate3DG09 pAR137 A1739 pAR365  
77 | pAR200 pARC\_07 M16\_185 PXP3\_03 Unig24G01  
78 | Gate2AD04 Unig22F05  
79 | Unig26F11 A1153 Gate4BA12 A1838 M16\_114  
80 | pAR10B09 Unig24G01 Unig26H12 C105 P12\_20  
81 | Unig26C03 BNL2662 TMB0517 Unig23B08 Unig26B10  
82 | Unig25C02 TMB0131 BNL1440 pAR509 PVNC416  
83 | pAR01\_28 PXP1\_08 CMS04 G1119 Gate3CC07  
84 | pAR335 PVNC061 Unig23G09 Unig27G09 pAR580  
85 | Gate4DB07 pAR897 TMB1282 Gate2CC08 Gate4CE01  
86 | Coau2G14 Coau2M17 LGA22 P05\_61 P06\_12  
87 | pAR02\_42 BNL1878 A1318 A1751 G1228  
88 | P11\_63 pAR112 pAR122 Unig28C07 Gateb17N07  
89 | P06\_26 pAR559 Unig06C12 Unig23G09  
90 | A1246 Gate4CD08 pAR1003 Unig23A04 P06\_58  
91 | pAR388 Unig23E11 CLU26 G1112 Gate1CC04  
92 | G1386 pGH372 Gate1CC04 pAR01\_08 A1650  
93 | pAR01F02 pAR597 pAR527 Unig22D05 Unig26C08  
94 | Unig22C06  
95 | HAU1168 pAR543 HAU2691 P01\_33 pVNC019  
96 | HAU2313 E1M54-M245.0 pVNC128  
97 | HAU0032 DPL0384 CLU523 BNL2448 A1690  
98 | CIR371  
99 | TMB1489 BNL3611 BNL3992 CIR034 NAU5417  
100 | JESPR197  
101 | HCLU1228 NAU3902 TMB0865 CIR401 pAR07G07  
102 | CLU3650 NAU3001 NAU3620  
103 | Gh083  
104 | HHAU1496 pAR01E01  
105 | HCLU2759 Coau1107  
106 | UCcg11049\_402 UCcg10827\_82 NAU6207 DPL0608 NAU0861  
107 | CLU3567 NAU6657 HAU0576  
108 | HE1M6\_205 CLU886  
109 | CIR062 UCcg10618\_125 HAU0627 UCcg10454\_108  
110 | CIR152 CLU4877 TMB0193 CLU2063 DPL0495  
111 | CLU952 BNL0218 MUSB0312 HAU0535 HAU1952  
112 | TMB1791 NAU3325  
113 | NAU2736 DPL0156 TMB0840 L713 BNL2988  
114 | TMB1496 CLU2698 CLU230  
115 | Gate3BG11 M16\_045 Unig23F09 MUSS099 CIR280  
116 | HAU1034 CLU4357 UCcg11049\_531 CLU4239 M16\_085  
117 | pAR062 Unig28F09 HAU3372  
118 | CLU193 CLU106 BNL3569 TMB0189 pAR065  
119 | TMC005 UCcg10641\_148 CLU2054  
120 | HBNL3029 HAU2783 NAU0779 Unig06G09 DPL0177  
121 | HNAU0922 UCcg10604\_117 NAU0828 DOW084  
122 | A1135 G1137 Gateb08C24 PXP2\_84 Unig22F08  
123 | HNAU0797 NAU1221 CLU216 UCcg11211\_413  
124 | DPL0241 NAU3935 CLU3244 CLU748 UCcg11000\_346  
125 | BNL3492  
126 | HGW37-390 NAU1372 UCcg10490\_331 UCcg10490\_49 UCcg11211\_484  
127 | UCcg10440\_267 CLU3691 BNL4071 DOW014 DPL0225  
128 | CIR102  
129 | HDPL0838 Y4018-850 HAU0633 CLU4009  
130 | CLU4169 UCcg11199\_82 DPL0594 BNL1044 BNL3020  
131 | DPL0022 CLU1182  
132 | CIR126 NAU3269 MUSS173 NAU5387 CLU208  
133 | HNAU5392 NAU2000 CLU37 CIR005  
134 | CLU3838 CLU3867 Y1355-195 NAU3826 pAR781  
135 | pGH530 CLU4155 UCcg10816\_112 NAU3405 CLU4422  
136 | MUCCS337 MUSS460 HAU1797 TMB1296 NAU3245  
137 | BNL3043 CLU3232  
138 | DPL0063 BNL1042 NAU1605 UCcot10109\_492 CLU2715  
139 | Y1349-345 Y1449 TMB1418  
140 | pAR931 MUSS024  
141 | BNL2865 CLU4368 UCcg10953\_529 Gate2BG07 CIR224  
142 | TMB0835  
143 | CLU4422  
144 | CIR067 CMS48  
145 | BNL3400  
146 | CLU3232  
147 | TMB0478  
148 | CLU108

# C6

|     |                                                           |
|-----|-----------------------------------------------------------|
| 0   | Gate1AA08 M16_147                                         |
| 5   | pAR10H09                                                  |
| 9   | A1640                                                     |
| 13  | A1599 pAR574                                              |
| 19  | Gate3BF02 Gate3CB02 Unig28H10 PVNC099                     |
| 28  | Unig27A10                                                 |
| 29  | P01_34                                                    |
| 31  | A1596                                                     |
| 34  | TMB1740                                                   |
| 36  | UCcg10762_238                                             |
| 41  | <b>NAU3427</b> Gate4CE05 NAU3601                          |
| 42  | Gh513                                                     |
| 43  | pAR01D06                                                  |
| 44  | UCcg10646_598 pAR01D03                                    |
| 46  | <b>NAU2773 BNL3594</b> UCcg10646_94 Coau3L05 <b>G1099</b> |
| 47  | DPL0613 CLU736 CLU877                                     |
| 49  | CIR128                                                    |
| 50  | BNL2823                                                   |
| 51  | CLU594                                                    |
| 52  | <b>NAU3677</b>                                            |
| 53  | Gh433                                                     |
| 56  | <b>Gh185</b>                                              |
| 58  | Coau1B09                                                  |
| 62  | DOW093                                                    |
| 63  | CLU926                                                    |
| 64  | pAR211 pAR768                                             |
| 65  | GhCFE                                                     |
| 66  | TMB1922                                                   |
| 67  | <b>NAU3206</b> MUSB0399                                   |
| 68  | E4M1_210 UCcg10547_155                                    |
| 69  | CIR322                                                    |
| 70  | <b>BNL2884</b>                                            |
| 71  | NAU3365                                                   |
| 73  | pAR264 pGH290 MUSB0078                                    |
| 74  | E1M5_332                                                  |
| 77  | <b>BNL3650</b>                                            |
| 78  | TMB1277                                                   |
| 79  | CLU27 CAC263 E15M16-300                                   |
| 80  | E5M7_160 DPL0811                                          |
| 81  | Y1189 DC1SA14-250                                         |
| 82  | E3M7_189 TMB2504 Y1313-170 <b>NAU4946</b>                 |
| 83  | <b>pAR717</b> TMB0872 CLU1295 <b>NAU2968</b> NAU3803      |
| 83  | CIR033 NAU0905 <b>NAU1277</b>                             |
| 84  | PXP4_48 A1763 MUSB0919 NAU5373 MUSB0971                   |
| 84  | GW63-160 Gate1DD01 pAR936 pAR949 HAU0210                  |
| 85  | MUSB0894 pAR03_32 Y2398 HAU2119 DPL0843                   |
| 85  | DPL0088                                                   |
| 86  | MUSB1278 <b>CLU4928 NAU1218</b> CLU1500 UCD251            |
| 86  | CLU585 E6M6_137 DC1OD24-215 Coau4J19 Unig26D12            |
| 86  | CLU2763 <b>JESPR194</b>                                   |
| 87  | E6M8_85 UCcg10767_455 E3M3_330 NAU3524 <b>TMB2958</b>     |
| 87  | DPL0566 HAU1293 CLU1111 BNL1044 CLU752                    |
| 87  | TMB0321 UCcg11137_400 HAU0091 <b>CLU1335</b> CLU671       |
| 88  | HAU1537 MUSB1064                                          |
| 88  | TMB2959 <b>CLU3879</b> BNL3955 DPL0684 BNL3295            |
| 88  | TMB0436 NAU6110 Y4004-300 BNL1169 CIR291                  |
| 88  | EM1OD30-230 me2em3-210 A1742 <b>BNL1064</b> Gate1AE02     |
| 88  | pAR10F02 pAR783 Unig06B11 Unig22H08 <b>BNL4108</b>        |
| 89  | E2M5_182 <b>A1152</b> E5M8_128 pGH663 CLU3993             |
| 89  | MUSB0955 E6M3_240 MUSB1188                                |
| 90  | CIR086 E7M5_340 E1M2-M236.4 E31M7-M328.7 TMB1484          |
| 90  | Coau2A23 Gate1BA09 PXP3_23 E3M4_410 TMB0703               |
| 90  | E7M5_370 E43M3-M250.5 NAU6185 E6M5_145 MUSB1164           |
| 91  | HAU2768 CIR079 meSOD12-130                                |
| 92  | E7M5_280 BNL1015 <b>BNL3812</b>                           |
| 93  | E2M6_360 BNL0861 E43M2-M335.3 JESPR247 pAR09H06           |
| 93  | CIR405                                                    |
| 94  | CIR233 BNL1153 CLU1560                                    |
| 95  | TMB1203                                                   |
| 96  | CS097 E2M2_158 <b>JESPR163</b> Gate3BA05                  |
| 97  | pGH906 <b>DPL0681</b> pAR485 pAR934 E3M52-M452.9          |
| 97  | E1M4-M197.2 pAR961 E14M15-115 CLU545 Coau1101             |
| 98  | Coau2E11 Coau4H09 Gate1CF01                               |
| 99  | E31M55-M220.2                                             |
| 100 | <b>Gh082</b> E43M3-M84.7                                  |
| 101 | CLU3841 <b>BNL1440</b>                                    |
| 102 | E10M3-140 UCD311                                          |
| 103 | <b>CLU1431</b> DPL0153 TMB2303 <b>NAU3489</b> em5GA30-115 |
| 104 | MUSB0754 A1402 NAU2971                                    |
| 105 | MUSB0500                                                  |
| 106 | Gate3AG06 E2M7_126 PXP4_08 Gate3AH06                      |
| 107 | NAU0433 <b>DPL0080 JESPR273</b> TMB1483                   |
| 108 | <b>DPL0847</b> CIR329                                     |
| 109 | E3M3_82                                                   |
| 110 | <b>CLU4295</b>                                            |
| 111 | NAU1151 A1550 pAR433 CLU816                               |
| 112 | <b>TMB1530</b> TMB1369                                    |
| 113 | BNL1592 pAR026 Gate4BB01 BNL1035 E7M1_102                 |
| 114 | Gh100                                                     |
| 115 | <b>DPL0101 NAU3489</b> DPL0035                            |
| 116 | Unig28F03                                                 |
| 117 | <b>CIR280</b> NAU1027                                     |
| 118 | TMB0274                                                   |
| 119 | Gafb17H13 PXP4_69 CLU54                                   |
| 120 | <b>CLU179</b>                                             |
| 121 | Coau1K12 G1273 P12_20                                     |
| 122 | HAU0975                                                   |
| 123 | Gh441                                                     |
| 127 | NAU0837 <b>A1215</b> pAR171                               |
| 128 | Gh039                                                     |
| 130 | TMD02-260 BNL1746                                         |
| 131 | <b>CLU4295</b>                                            |
| 133 | <b>CLU21</b>                                              |
| 134 | DPL0588 NAU2967                                           |
| 135 | <b>CLU80</b> TMB0853                                      |
| 136 | <b>TMB0154</b>                                            |
| 138 | <b>Gh032</b>                                              |
| 140 | CIR298                                                    |
| 141 | UCcot10097_176                                            |
| 143 | <b>CIR017</b> NAU1606 CLU1071                             |
| 145 | BNL0827 <b>BNL0584</b>                                    |
| 146 | BNL1902 <b>CIR267</b>                                     |
| 147 | CLU3901 <b>DPL0328 BNL3359</b>                            |
| 150 | UCcg10870_337                                             |
| 151 | UCcg10870_207                                             |
| 152 | BNL1076                                                   |
| 153 | <b>CLU63</b> NAU2713                                      |
| 155 | CLU4097                                                   |

c7

0 | PXP4\_71  
5 | A1826  
7 | pAR078  
8 | P11\_72  
10 | Gafb05F01  
12 | HpAR10F12 pAR515  
15 | Gate1CB11  
16 | Unig26E07  
23 | Unig27C06  
25 | HDPL0119 pAR057  
26 | NAU2308  
29 | CLU4331  
30 | Unig26B04  
31 | HpAR711 HAU1764  
32 | E1M7\_80 P05\_11  
34 | BNL0836 pAR049 TMB2955  
35 | HpAR04D08 Unig22A01  
36 | HCLU1460 A1625 pAR057 pAR188  
38 | BNL3309  
39 | UCcg10539\_516  
40 | HGate1AA05 pAR237 Gate1DG04  
41 | HG1016 MUSB0859  
42 | HGate3CB09 Coau2O24 Gate1DH08 pAR01F03  
46 | HGate3BE11 Unig26C04  
48 | CLU980  
49 | NAU2186  
50 | H Gafb05B01 E6M6\_96  
51 | HCMS37 MUSB0139  
52 | pAR291  
54 | CG05  
55 | HUnig25H02 CLU525  
56 | HE6M5\_100 MUCS443  
57 | HGate1BF05 DOW097 E1M2\_117  
58 | HGate3BD02 E3M6\_186 A1559  
59 | HCoau4M13 Gate3CH01 pAR934 JESPR237 DPL0852  
60 | CG01  
61 | GH548 CIR028 CIR262 BNL1604  
E2M2\_225 CLU1083 GW48-350 pAR356 E7M8\_400  
E1M1\_161 E1M4\_500 E6M8\_320 Gate3BB10 pAR024  
pAR03\_36 pAR606 pAR897 pGH310 E1M4\_490  
E4M3\_320 pAR05G10 SAMPL01-110  
TMB2566 E8M6\_400 Gate1AE01 PXP4\_05 G1045  
E3M7\_270 BNL1395 pAR887 MUCS308 pAR319  
A1046 pAR040 pAR141 pAR173 pAR664  
E5M8\_206 NAU2995 CLU762 TMB0104 E1M3\_128  
63 | Gh527  
TMB0095 CLU188 pAR199 pGH646 DPL0403  
HAU0597 HAU1172 Y1315-370 TMB2944 E5M4\_86  
65 | BNL1694 BNL2733 BNL2441 Y1316-900  
CIR142 E7M15-155 CIR141 TMB0837 UCcg11377\_165  
66 | CLU147 TMB2844 CM66 CM66 TMB0180  
BNL2766 TMB0009 TMB0694 TMB0046 HAU0033  
67 | DPL0009 DPL0448 BNL1026 E5M6\_160 BNL3602  
Y2275 TMB0561 NAU2975  
NAU0463 JESPR297 JESPR228 BNL1694 me3em5-215  
NAU0202 BNL3871 CS057 CLU1358 Y4024-370  
68 | MUSB1081 NAU1800  
pAR284 Unig22B11 E2M4\_209 CLU8 HAU1399  
69 | CLU2078 E43M2-M271.3  
E5M6\_76 CLU92 CIR323 NAU6294  
70 | E1M2-M121.0 DOW042 pAR402 E3M4-M174.9 E43M3-M302.0  
71 | BNL3415  
CLU2705 MUCS382 CG23 E43M52-M-553.6  
72 | JESPR012 CLU1206 E31M2-M461.9  
73 | TMB1561 E43M52-M270.9 TMB1844 BNL3319 TMB1618  
74 | pAR210  
75 | DPL0234  
76 | A1604 pAR979 DPL0292  
77 | me1em5-420 UCcg11001\_185 HAU1754  
79 | CLU3527 DPL0751 Gate4BG08 pAR820  
80 | UCcot10272\_724 CLU218  
81 | H Gafb2111 Gate2DE01 MUCS253  
82 | HGate1AB07 Gate4CF03 pGH390 Unig26C07 Gh055  
83 | CIR335 CLU3976  
84 | CLU2700 UCcg11026\_617  
85 | HMUSS006 UCcg10600\_133 me5em3-375  
86 | HGate2DD02 MUSB0625 CG26  
87 | BNL0580  
88 | HMUSB0463 CIR393 Gate1AH04 JESPR065  
89 | HCLU89 E8M8\_520  
90 | HGate1AD04 UCcg10296\_250  
91 | HCLU3992 UCcg11440\_119 UCcg10921\_202  
92 | NAU2186 UCcg10770\_168  
93 | NAU2772 CIR169  
94 | me5OD12-310  
95 | CLU2102  
96 | H DOW078 Gate4CD12  
97 | CLU1166  
98 | A1182  
99 | HESTS196 CLU4215 PVNC030 R2  
100 | UCcg10436\_1035 Unig27D04  
101 | HAU0775  
102 | JA1189 BNL1597 Coau1C04 pAR06A09 pAR615  
103 | pAR624 pGH408 NAU0845  
104 | HCLU3427 E8M6\_115 pAR07A02  
105 | HCLU3427 NAU3735  
106 | CLU4153  
107 | CIR412 DPL0136 BNL3793 DPL0607  
108 | HCLU1749 BNL1531  
109 | HJESPR038 G1185  
110 | coau4N19  
111 | CLU2087  
112 | HCLU1503 E3M8\_97  
113 | E1M3-M245.0  
114 | CLU1553  
115 | HCLU4087 Gate1BD08 Gate1DB07 pAR10F06  
116 | A1597  
117 | HpAR048 NAU0474  
118 | DPL0186 CLU1924 CLU1749  
119 | HCLU697 HAU2371  
120 | NAU5152  
121 | pAR888  
122 | HpAR01\_25 Unig23C07 Gate06B10 NAU5303  
123 | NAU3918  
124 | HNAU0845 CLU991 MUSB1181  
125 | G1158  
126 | HNAU3654 Unig28A10  
127 | CIR320  
128 | UCcg10503\_331 CIR238  
129 | HBNL1022 pAR04D08  
130 | A1478  
131 | MUS011  
132 | HA1135 Gate1CF06 pAR395  
133 | Gate3DF04  
134 | PVNC127  
135 | CLU1419  
136 | UCcg11240\_816  
137 | UCcg10428\_166  
138 | HMUSS013 Coau2C21  
139 | DPL0364  
140 | DOW007  
141 | NAU0933

**C8**

0 | CLU764  
5 | **NAU0920**  
6 | -NAU6100  
7 | -DPL0152  
8 | **TMB1427 MUSB0812** Coau2L09  
9 | **CIR244**  
10 | **NAU3482**  
11 | -Gate1CF06  
13 | **Coau212 NAU3010**  
14 | **A1783** Coau1M19 **G1114** pAR540  
15 | -CLU946  
18 | **JESPR232**  
21 | **Gate1AF08** P01\_08 pGH742  
24 | -Gate1CE09  
25 | **Gate4CH11** pAR06G04  
26 | **pAR792**  
27 | -A1698  
28 | -Gate2CC06  
29 | -NAU1254  
30 | **HNL2772** A1216 A1706  
32 | **NAU1017** pAR968  
33 | -CLU4158  
34 | **NAU2407** JESPR157  
35 | **TMB2781**  
38 | **DOW098 A1679** A1731 **Gate1AF01** M16\_088  
39 | **P06\_26**  
39 | -NAU0789  
40 | -NAU3773  
41 | **CLU109** Y12921  
42 | **UCcg11032\_991**  
43 | -CLU549  
44 | **CLU4761**  
45 | **TMB1702** **CLU4883** **CLU4883** GhVP1  
46 | **JESPR066**  
47 | **Gate16D09** **Gate1AE07** **Gate4CC07** **Gate4CG09** W11  
48 | **NAU3558** E3M6\_149  
48 | -TMB2899  
50 | **TMB1809** **Coau2A22**  
53 | **NAU1369** pVNC244  
55 | **NAU6111** pGH242  
56 | **CLU2331** **Gate2BF03** MUSB0100  
58 | **MUCS188** CIR119  
59 | **Gate4DD02** **BNL3556**  
60 | **UCcg10173\_184** **UCcg11333\_1093** CIR354 **CLU87**  
62 | **CLU816** E2M3\_261 **TMB1640** **CLU527**  
63 | **CLU1764** **NAU2881** E4M7\_161  
64 | **GA3-hydroxylase1** **CLU606**  
65 | **CLU607** **HAU2585** **CLU527** **A1412** **CLU1166**  
66 | **BNL3255** E6M16-220  
67 | **UCcg10246\_299**  
68 | **FIF1800**  
69 | **NAU3201** DOW057  
70 | **CLU684**  
71 | **CLU1527**  
72 | **TMB0834** **UCcg11114\_430** **Unig22E12** **BNL2961**  
73 | **BNL1044** **UCcg11327\_536**  
74 | **Coau1O15** **TMB2279**  
75 | **DPL0646** **DPL0176**  
76 | **TMB1966** A1108 pGH244 **HAU3211**  
77 | **NAU2214**  
78 | **TMB1675**  
79 | **JESPR039** **TMB2929** **EM2OD13-105** **JESPR046**  
80 | **JESPR035**  
81 | **me1em6-80**  
82 | **NAU1505**  
83 | **A1691** **Unig25B12**  
84 | **UCcg11108\_240** **NAU3605** **DPL0031** **UCcg10265\_529**  
86 | **UCcg10265\_340** **TMC18-225**  
87 | **CLU1630**  
88 | **CLU4317** **Coau1O15** **Unig24D03**  
89 | **UCcg10647\_235**  
90 | **CLU2331** pAR523 **pAR785** **Unig27G11** **DPL0861**  
91 | **E1M5\_85** **E2M6\_322** **UCcg10647\_155** **TMB2103** **E1M3\_270**  
92 | **GW55-250** **MUSB0780** **E8M2\_204** **NAU6134**  
93 | **BNL1303** **UCcg11373\_298** **NAU6557** **TMB2107** **NAU4080**  
94 | **HAU3349** **GW42-185** **NAU3632** **CLU1349** **BNL2993**  
95 | **EM2GA38-340** **TMB1639** **HAU0356** **em5GA30-55**  
95 | **CLU2116** **Y1306-380** **NAU1531** **CLU1940** **NAU5173**  
96 | **NAU3199** **UCcot10030\_1469** **NAU3769**  
96 | **JESPR005** **NAU0520** **CLU343**  
97 | **em5DC1-300** **NAU3058**  
98 | **CLU1676** **E1M7\_219** **Gate2BC04** **JESPR090** **NAU4010**  
99 | **MUSB1188** **Y1325-420**  
100 | **ESM6\_145** **MUSB0073** **em6GA33-165** **Unig22C03** **CLU995**  
101 | **Gh532** **E9M14-230** **em6SA12-75**  
102 | **E3M1\_212** **Gate4BG11** **BNL1664** **MUSB0662**  
103 | **BNL3474** pAR854 **BNL1017** A1828 **CLU3**  
103 | pAR03\_15 **DPL0457**  
103 | **BNL3255** **CLU172** **CLU44** **G1018** pAR01\_40  
104 | **PAR953** **Gate1A906** **Gate3DA02** **Unig27F12** **Gate2CD01**  
104 | **A1401** **A1590** **Gate4DA08** **M16\_200** **P05\_09**  
104 | pAR118 pAR798 pGH318 pGH422 **BNL3257**  
104 | **BNL0387**  
105 | **MUCS248** **CLU1339** **P01\_02** **DPL0755** **HAU0672**  
105 | **DPL0113** pAR973 **HAU1632** **MUSB0442**  
106 | **CLU3257** **TMB0029** **DPL0220** **CLU1290** **UCcg10786\_208**  
107 | **CS101** **CM43** **E8M5\_430** **MUSB1001**  
108 | **TMB1717** **E8M6\_220** **E7M2\_95** **E3M2\_250** **E2M3\_198**  
108 | **ESM3\_240** **DPL0839** **E5M6\_75** **E2M7\_87** **E1M5\_167**  
108 | **CIR291**  
109 | **MUSB0818** **MUSB0958** **E6M6\_550** **E4M3\_106** **MUSB0139**  
109 | **BNL2527** **CLU77** **E7M5\_95** **E2M4\_239** **E5M4\_410**  
109 | **E4M8\_330** **E2M4\_300**  
111 | **E2M7\_170** **E2M2\_340**  
112 | **HAU1547** **UCcg10445\_448**  
114 | **HAU1749**  
115 | **CG24**  
116 | **TMB0528** pVNC149  
117 | **CIR278**  
120 | **HAU1308** **BNL3627**  
121 | **UCG04** **P05\_18** pAR03\_07 **pAR950**  
122 | **E7M16-250**  
123 | **Gate13B07** **Unig06G04**  
124 | **BNL3800** **Gate1BF02** **Unig25C01**  
125 | **JESPR230** **UCcot10157\_54** **CLU3834** **Gate3CH11**  
126 | **Gate1BH09**  
127 | pAR04\_11 **HAU1390** **UCcot10157\_256**  
128 | **NAU0882** **Coau2A22**  
129 | -pAR789  
131 | **CLU1601**  
133 | **Gate1BF03**  
134 | **CIR343** **CLU101** **A1658** **P01\_46**  
135 | **NAU1209** **CLU13**  
136 | pAR978 **E6M6-130**  
137 | **G1101** **Gate2BC08** **CLU1207**  
139 | **UCD552** **Y1322-1200**  
141 | **E2M6\_159** **G1078** **Gate3CA01** **Unig26G07**  
150 | **E14M4-140** **MUSS409**  
151 | -pAR123  
153 | **Gate4DC08** **MUSS021**  
156 | **G1276** pAR490  
159 | **DPL0749** **MUCS021**  
160 | **JESPR291**  
168 | **CLU1012**  
170 | **CIR028** **NAU3668**  
175 | **NAU3324**  
190 | **CLU4360**  
191 | **NAU3590**



**C9**

- 0 | BNL2681
- 7 | BNL1707
- 14 | E4M5\_140
- 15 | pAR288
- 18 | E5M7\_290 Gate1AD03
- 19 | CIR077 CIR079
- 20 | **A1737**
- 22 | BNL4049 Unig25E04
- 23 | Gate1AB08 Unig22D10 Gate3BE02 Unig27G12 NAU0987
- 23 | E41M4-M401.5 BNL3279 G1040 pVNC251 **BNL3626**
- 23 | Coau2K19 Gate2CC09
- 24 | Coau2C14 Coau4H09 Gate4DE09 P08\_36 P12\_12
- 24 | pAR068 **pAR144** Unig23E02
- 25 | E31M55-M93.2 E6M8\_168 E12M12-80
- 26 | **NAU5468 BNL0686**
- 27 | **DPL0222**
- 28 | TMF17-250 HAU2496 CLU941 **NAU3888**
- 29 | BNL1670 NAU3538 pAR127 TMB0177
- 30 | **Gh486 JESPR274**
- 31 | TMB2916 E7M4\_192
- 32 | NAU6668 **CLU233** NAU6177
- 33 | TMB0991 CLU2057 NAU6418 TMB0670
- 34 | E12M3-250
- 35 | **CLU234** E6M5\_87
- 36 | NAU3101
- 37 | **BNL1162** E1M4\_480 **CIR019**
- 38 | **Gh539 DPL0679 DPL0618**
- 39 | E11M10-95 Gh027 CIR372 OD3GA38-600 Gh098
- 39 | E6M8\_269
- 40 | PXP1\_48 MUSS604 **DPL0659** E7M3\_292 **CLU1336**
- 40 | DPL0854 NAU6272 CIR291 E6M1\_86 CG06
- 40 | Y3999-240 **CLU234 NAU5017** Y1357-245
- 41 | **CLU233** NAU2575 E3M5\_240 **DPL0550** E10M6-160
- 41 | **CLU98**
- 42 | UCcot10138\_1328 DPL0298 UCcot10138\_116 JESPR247 **JESPR274**
- 42 | NAU3159 BNL3948
- 43 | HAU2780 CLU2154 E1M7\_170 TMB0244 **NAU3194**
- 43 | BNL1423
- 44 | MUSS432 E1M51-M102.2 MUSB0995 CIR227 DC1SA21-130
- 44 | MUSB0907 DC1OD8-100
- 45 | Gate3CG11 MUSB0087 E5M7\_300 E1M4-M128.5 MUSB1040
- 46 | NAU2832 E41M4-M166.5 Gh697 E31M53-M113.9
- 47 | **MUSB0958** E43M3-M222.9 MUSB0969
- 48 | NAU0966
- 49 | DPL0507 E1M4-M171.3 E1M2-M134.0 **NAU0859** BNL3874
- 50 | E43M52-M72.8 **CLU15** pAR01\_12 pAR083 CLU3861
- 50 | HAU0045
- 51 | TMB0184 TMF18-220 E1M4-M197.5 TMB0815 UCcg10978\_410
- 52 | Y1677 DOW037 E43M2-M187.3
- 53 | DOW076 E6M11-340
- 54 | **TMB2920**
- 55 | MUSS087 NAU3439
- 56 | CLU552 CLU1325
- 57 | **BNL3779**
- 60 | **CLU15**
- 62 | GW69-370 CLU540 MUSS110
- 63 | Gate1AB09 Gate4DF03 CLU3860
- 64 | BNL1515 NAU2322 A1270 pAR117 MUSB0818
- 64 | JESPR230
- 65 | pAR085 pAR328 pGH390
- 66 | **CLU577** HAU1966 TMB1395
- 67 | HAU0253 E16M11-170 CG13 BNL2611
- 68 | HAU1835 **NAU1360** STV177
- 69 | E31M53-M51.5 **CLU33** me3em2-165 MUSS579
- 70 | **BNL3582** Coau1C24 Coau1L24 me3em2-265
- 71 | CLU384
- 72 | **Gh118** E3M1\_450
- 73 | NAU3967
- 74 | MUSS266 pAR341
- 76 | **BNL2847** BNL3140 CLU1374
- 77 | CLU4527 pAR619 HAU3109 HAU3027
- 78 | Gate2BG05 CG11 **DPL0850** TMB2551
- 79 | **BNL3582** pGH647 Unig23E08 **TMB2483**
- 80 | CLU2742 **NAU1009**
- 81 | M92 CLU261
- 82 | CLU273
- 83 | **NAU3358 A1471** G1267 Gate2BB08 Gate4AD03
- 83 | PXP4\_06 Y4013-480 **JESPR248** A1744 Gate1AE10
- 84 | pAR808 Unig28E09
- 85 | E1M3-M159.6 NAU5069
- 86 | Coau2A01 pGH502 CLU2285 pGH783 PXP4\_23
- 87 | IMUCS426 Coau1H12
- 87 | Coau1111
- 88 | **BNL1317** MUSS397
- 89 | **CLU286** Gate2BE06
- 90 | Unig25A09
- 91 | NAU0490 UCcg10773\_103 **pAR963**
- 92 | pARC\_15 UCD248 E41M1-M129.1
- 93 | **CLU2097** NAU1493 NAU0858
- 94 | **CLU1834** E31M2-M220.6
- 96 | pAR0C\_15 JESPR290 NAU1045 Unig27B04 Unig28D02
- 96 | CLU197
- 97 | CLU1131 **BNL1030 BNL0219** DPL0885 **BNL1414**
- 97 | Gate4DH06 pAR022 **CLU1704** NAU0414 **CLU151**
- 98 | NAU0415 **BNL1043**
- 98 | NAU5494 **NAU3365** A1733 MGHE502
- 100 | **BNL4028**
- 101 | E43M2-M89.3 coau2N18 **P10\_62**
- 103 | **MUSS983** UCcot10469\_352
- 105 | **BNL2590**
- 107 | CLU1779
- 108 | CLU576 **CLU2077** NAU3061
- 109 | pAR07C05 pAR240
- 110 | Gate3CF09 **BNL0274**
- 111 | UCcg11238\_448
- 112 | E42M1-M179.3
- 113 | UCcg11450\_484 NAU0462 E5M5\_158 Gate1CF01
- 114 | pAR873 **CLU4356**
- 115 | pAR07C01 **MUSS022**
- 116 | CLU3725
- 117 | **DPL0395** BNL4099 NAU6101
- 118 | PXP2\_05
- 119 | CLU2700 E16M15-380
- 120 | HAU0085
- 121 | NAU0864 UCcg11138\_58
- 122 | HAU0583 **NAU2354** BNL2750 CLU4100
- 123 | **JESPR095 DPL0541**
- 124 | **NAU1360 E1M3\_116**
- 125 | HAU2852
- 126 | **BNL0597** pAR804
- 127 | P02\_37 Unig26B08
- 128 | **CLU352** P02\_27 Unig27F07 **pAR144** Unig24E02
- 129 | Gate2CA02
- 129 | A1707 **BNL4053** Coau1H15 Gate3BF10
- 131 | BNL3173
- 132 | Coau2C13
- 135 | **CLU352** PXP3\_07
- 140 | CG21
- 146 | At60

# c10

|     |                                                       |
|-----|-------------------------------------------------------|
| 0   | P12_19                                                |
| 3   | HXP1_26 HAU2824                                       |
| 6   | HAU2147                                               |
| 7   | HAU6605 Gate2AC08 pAR572 pAR709                       |
| 10  | E8M8_66                                               |
| 15  | HAU6263                                               |
| 20  | Coau2K21                                              |
| 23  | pVNC149                                               |
| 26  | HAU1169                                               |
| 27  | Unig22C10                                             |
| 30  | pGH597 pXP4_38                                        |
| 34  | UCcg10649_574 CIR305 Gate3BE04                        |
| 37  | CLU27                                                 |
| 39  | CLU220 Gate1DG09                                      |
| 40  | Gh283                                                 |
| 44  | CLU804 CIR166                                         |
| 45  | HAU3262 Gh058                                         |
| 47  | HAU2991 EM2OD13-380 CLU3831                           |
| 48  | HAU2911                                               |
| 49  | HAU1936 A1708 pAR144 HAU2009                          |
| 50  | BNL0511                                               |
| 51  | MUSS096                                               |
| 52  | UCcg10864_658 UCcg10864_146 DPL0831 CLU938            |
| 53  | Gh199                                                 |
| 54  | Gate2BH02 E3M5_470 UCcot10162_137 CLU1579             |
| 55  | MUSS068 MUCS009                                       |
| 56  | MUSB1048 Coau1C12 NAU1182                             |
| 57  | A1183 UCcg1002_222 BNL2960 SAMPL03-190 pAR675         |
| 58  | A1183 PXP1_40 E5M6_82 TMB0161                         |
| 59  | MUSS082 GhAnn3 E3M3_360                               |
| 60  | BNL3363                                               |
| 61  | TMB0352                                               |
| 62  | CLU3013 OD3GA38-220 Gate1BC08 NAU2989                 |
| 63  | HAU3122                                               |
| 64  | pAR09D03 CIR082                                       |
| 65  | HAU2869 MUSB1168                                      |
| 67  | me1SA9-400                                            |
| 68  | IA1110 DPL0317 TMA18-180                              |
| 69  | E1M3_370 NAU6215 BNL3790 Y2423 Gate4BC08              |
| 70  | HAU0230 CLU31 NAU3665 Coau1E05 PXP1_30                |
| 71  | UCcg10239_93 CLU3400                                  |
| 72  | UCcg10239_279 NAU6667 Gate3DA08                       |
| 73  | HAU3873 NAU6515 CLU1019 CIR016                        |
| 74  | CLU4858 HAU2874 E6M8_308 NAU5438 TMB1356              |
| 75  | E1M3-M254.8                                           |
| 75  | E2M7_158 CIR055 CLU1212 CIR104 E7M8_410               |
| 76  | HAU6753 E2M8_96 NAU1041                               |
| 76  | HAU6132 CLU2619 BNL1569 TMB0325 STV100                |
| 77  | TMB0307 CLU10 E8M1_360 BNL2705                        |
| 77  | TMB2962 TMC10-200                                     |
| 78  | E41M1-M374.6 Gate1AF09 Gate1CE10 Gate3CB05 Coau1C21   |
| 78  | Gate3CA08 pAR055 BNL1669                              |
| 79  | Gate4CA04 pGH700 UCcg10343_384                        |
| 81  | E5M1-M170.9 pAR02_18 Gate3CG03 NAU0921                |
| 81  | Gate3CD03 E8M8_490 MUSB1064 Gate3CB05 Gate4CA04       |
| 82  | Gate4DF12                                             |
| 83  | JESPR006 BNL1989                                      |
| 84  | Gate3BB05 Gate3CB09 Gate3CG03 Gate4DF11 Gate4DG06     |
| 84  | MUSB0596 BNL3834 Y1816                                |
| 85  | GW6-400 BNL2872                                       |
| 86  | UCcot10015_139 BNL1253 UCcg10455_309 TMO05-250        |
| 87  | CM27 Gate3BB05 Unig25A11 UCcg10455_174                |
| 88  | HAU0785 HAU1314                                       |
| 90  | BNL3895 DPL0468 NAU3682 DPL0431 TMB0812               |
| 91  | CLU3918 TMB0858 NAU6393 Gate1CF10                     |
| 92  | BNL2647 Gh236 E7M4_88                                 |
| 93  | DC1GA5-400 M99 E1M54-M376.8 ME8GA28-225               |
| 94  | HAU5362 Gh573 E3M2-M111.3 CLU3981 E31M2-M190.7        |
| 94  | DPL0738 E1M4-M100.5                                   |
| 95  | E41M1-M668.9 E1M4-M360.5 CLU1076 E43M4-M159.5 MUCS494 |
| 95  | UCcg10478_114                                         |
| 96  | CLU4087 BNL1665                                       |
| 96  | CIR171 JESPR259 BNL3319 NAU0456 NAU2166               |
| 97  | BNL3499 E3M2_88 OD3GA34-205 me1DC1-260 E6M6_440       |
| 97  | CLU3956                                               |
| 98  | E8M3_63 E3M1_259 JESPR056 CIR018 E8M4_260             |
| 98  | UCcg10021_472 E6M8_235 CIR291 TMB1288 UCcg10021_546   |
| 98  | E3M54-M429.0 pVNC163 UCcg10021_287                    |
| 99  | E1M6_240 CIR400 BNL4016 E2M5_355 UCcg11337_60         |
| 99  | BNL2631                                               |
| 100 | DPL0670                                               |
| 101 | me1GA13-115 TMB1745 CLU1076 E7M5_510                  |
| 102 | pVNC106 BNL2530 HAU3201                               |
| 103 | Gate1AB08 NAU2935 TMB1806                             |
| 104 | E11M8-90 Gate3BD09 G1059 P12_28 CLU18                 |
| 105 | Gate1DF08                                             |
| 106 | MUSB0831 A1695 Gate1BC10 Gate1CB10 Unig06H02          |
| 107 | MUSB0847                                              |
| 107 | Coau3F17 P06_47 MUSB0958                              |
| 108 | MUSB1230 HAU1423                                      |
| 109 | HCG24 MUSB1188                                        |
| 112 | MERG2-130                                             |
| 113 | BNL1160 OD3OD17-205 Gate2BF02 Gate2CC04 Gate4AE01     |
| 115 | Gate4AD08 Unig26B01 Unig28C09 JESPR261                |
| 116 | pAR10A09                                              |
| 117 | E2M6_241                                              |
| 118 | HAU4880 GhTR1                                         |
| 119 | HAU0635                                               |
| 120 | MUSB0808                                              |
| 121 | E5M3_108 pBAM250 pGH653                               |
| 122 | BNL0256 MUSB0625                                      |
| 123 | Gate4DH08                                             |
| 124 | CLU3598                                               |
| 125 | MUSB0606 Gate1BF03                                    |
| 126 | HAU0440 CLU1580                                       |
| 127 | Unig26E05 Unig28G09                                   |
| 129 | CIR372 G1257                                          |
| 130 | CLU897 pAR860                                         |
| 131 | A1344                                                 |
| 132 | pGH588 A1163 Gate1BE03 pGH295                         |
| 133 | Coau4J15 CLU1462 Gate1CE04 Gate4AG08 Gate4BA10        |
| 134 | CLU1432                                               |
| 135 | CLU1360 Gafb17N07                                     |
| 137 | Gh645                                                 |
| 138 | G1272                                                 |
| 139 | CLU1715 A1158 Unig28C07                               |
| 140 | DOW095                                                |
| 142 | E6M7_600                                              |
| 143 | Gate2AF06 Gate4CA05 Unig26D08                         |
| 144 | HA1468 HAU0894                                        |
| 153 | Unig25H10                                             |
| 154 | CLU4529                                               |
| 160 | HAU2531 NAU2532 NAU2538 NAU2534                       |
| 163 | CLU519                                                |
| 165 | Unig27B09                                             |
| 171 | CIR285                                                |
| 176 | Gate3BE08 pAR468                                      |
| 180 | OD3OD17-150                                           |
| 184 | STV031                                                |

c11

0 - A1346  
1 - CLU113  
2 - E6M8\_500  
3 - CLU1044  
4 - CLU3359  
5 -  
6 -  
7 -  
8 -  
9 -  
10 -  
11 -  
12 -  
13 -  
14 -  
15 -  
16 -  
17 -  
18 -  
19 -  
20 -  
21 -  
22 -  
23 -  
24 -  
25 -  
26 -  
27 -  
28 -  
29 -  
30 -  
31 -  
32 -  
33 -  
34 -  
35 -  
36 -  
37 -  
38 -  
39 -  
40 -  
41 -  
42 -  
43 -  
44 -  
45 -  
46 -  
47 -  
48 -  
49 -  
50 -  
51 -  
52 -  
53 -  
54 -  
55 -  
56 -  
57 -  
58 -  
59 -  
60 -  
61 -  
62 -  
63 -  
64 -  
65 -  
66 -  
67 -  
68 -  
69 -  
70 -  
71 -  
72 -  
73 -  
74 -  
75 -  
76 -  
77 -  
78 -  
79 -  
80 -  
81 -  
82 -  
83 -  
84 -  
85 -  
86 -  
87 -  
88 -  
89 -  
90 -  
91 -  
92 -  
93 -  
94 -  
95 -  
96 -  
97 -  
98 -  
99 -  
100 -  
101 -  
102 -  
103 -  
104 -  
105 -  
106 -  
107 -  
108 -  
109 -  
110 -  
111 -  
112 -  
113 -  
114 -  
115 -  
116 -  
117 -  
118 -  
119 -  
120 -  
121 -  
122 -  
123 -  
124 -  
125 -  
126 -  
127 -  
128 -  
129 -  
130 -  
131 -  
132 -  
133 -  
134 -  
135 -  
136 -  
137 -  
138 -  
139 -  
140 -  
141 -  
142 -  
143 -  
144 -  
145 -  
146 -  
147 -  
148 -  
149 -  
150 -  
151 -  
152 -  
153 -  
154 -  
155 -  
156 -  
157 -  
158 -  
159 -  
160 -  
161 -  
162 -  
163 -  
164 -  
165 -  
166 -  
167 -  
168 -  
169 -  
170 -  
171 -  
172 -  
173 -  
174 -  
175 -  
176 -  
177 -  
178 -  
179 -  
180 -  
181 -  
182 -  
183 -  
184 -  
185 -  
186 -  
187 -  
188 -  
189 -  
190 -  
191 -  
192 -  
193 -  
194 -  
195 -  
196 -  
197 -  
198 -  
199 -  
200 -  
201 -  
202 -  
203 -  
204 -  
205 -  
206 -  
207 -  
208 -  
209 -  
210 -  
211 -  
212 -  
213 -  
214 -  
215 -  
216 -  
217 -  
218 -  
219 -  
220 -  
221 -  
222 -  
223 -  
224 -  
225 -  
226 -  
227 -  
228 -

# c12

|     |                                                             |
|-----|-------------------------------------------------------------|
| 0   | DPL0580                                                     |
| 2   | MUSB0495                                                    |
| 4   | NAU3109                                                     |
| 5   | <b>DPL0469</b>                                              |
| 7   | Y4013-1200 NAU3426                                          |
| 8   | TMB0799 UCcot10318_484                                      |
| 9   | DPL0835                                                     |
| 12  | NAU4047                                                     |
| 13  | CLU1571                                                     |
| 14  | pAR177                                                      |
| 17  | Gate3CC06 <b>NAU3561</b> E6M5_103                           |
| 18  | pGH337 DOW047                                               |
| 19  | Gate3BF02 Unig27F05                                         |
| 20  | Gate3BB04                                                   |
| 21  | Y1032 A1685 A1807 G1176                                     |
| 23  | TMB1888                                                     |
| 24  | Unig28B03                                                   |
| 25  | E4M5_500                                                    |
| 27  | <b>NAU3862</b> Gate4BC01 UCcot10242_135                     |
| 27  | BNL2578                                                     |
| 28  | UCcg10645_71 Gate2AC07 <b>JESPR295</b> Gate3CC01 pGH331     |
| 29  | <b>MUSB1117</b>                                             |
| 30  | CLU1703 BNL4041                                             |
| 31  | pAR265 pAR479 Unig24D12 em6PM8-600                          |
| 32  | TMB1735 <b>NAU3897</b> A1780                                |
| 33  | <b>Gh568 BNL3261</b>                                        |
| 34  | OD3GA38-270 pAR01E07 Unig25G11                              |
| 35  | NAU1274 UCcot10236_1046 BNL2657                             |
| 36  | hme1em3-270 E42M2-M309.2                                    |
| 37  | NAU0526 DC1OD8-120 E43M4-M193.2 UCD248 CLU45                |
| 38  | <b>BNL2621</b> Coau3D09 pVNC190                             |
| 39  | E7M5_270 <b>MUSS026</b> CLU1177                             |
| 40  | CM50 Y1352-260 DPL0856 <b>CLU28</b>                         |
| 41  | <b>CLU132</b> MUCS332 DPL0593 DPL0039 CLU144                |
| 41  | E3M52-M339.3 Gate4DF03 E1M4_410                             |
| 42  | E1M3_252 OD3OD22-550 E1M5_135 E1M7_75 E43M3-M139.2          |
| 42  | CLU166 <b>BNL3835</b> TME12-150                             |
| 43  | E31M2-M242.2 <b>DPL0801</b> E4M7_300 E43M52-M167.8 E1M6_380 |
| 43  | E1M54-M229.4 CLU1638 E3M54-M243.6 E3M7_194 E4M7_142         |
| 43  | <b>A1719</b> pAR06B11 pAR06E10 pAR534 pGH405                |
| 44  | PXP2_78                                                     |
| 44  | CLU1690 A1740 Aco1 pAR1004 pAR565                           |
| 44  | pAR982 BNL3811 Gate4AE01 E2M6_114 <b>BNL3599</b>            |
| 44  | CLU1608 MUSB1035 Unig26G02 Unig28G04 E5M2_185               |
| 44  | Unig06B09 JESPR250 A1557 Unig25C10 <b>Unig27G02</b>         |
| 44  | E5M5_395 NAU6659                                            |
| 45  | <b>CLU72</b> E3M8_165 BNL0193 <b>BNL1227</b> ME8SA14-305    |
| 45  | BNL2967 Unig23H04 DPL0480 CIR291 Gate2CE08                  |
| 45  | UCcg10310_614 CG07 UCcg10606_239 BNL3867 TMB0327            |
| 45  | pAR01C06 Unig26C04 <b>Unig27G02</b> <b>CLU1005</b> TMB2557  |
| 45  | NAU3441 DPL0866 E4M8_520 me5em5-420 NAU3812                 |
| 45  | E3M5_460 NAU6636 BNL3379 HAU0545 CLU214                     |
| 46  | E4M1_280 E6M6_360 E8M5_250 Gate3BG09 Gate4AF08              |
| 46  | BNL3836 MUSS018 CLU2708 E2M6_138 GW33-250                   |
| 46  | CIR133 E7M7_152 Y1315-420 MUSB1242 MUSB0799                 |
| 46  | DC1SA14-270 MUSB0846                                        |
| 47  | Gate1CD11 NAU6542 CLU46 GW60-260 <b>DPL0280</b>             |
| 47  | DPL0742 GW61-275                                            |
| 48  | MUSS101 E41M1-M190.1 MUSB0303 Gate1AC08 <b>CLU3809</b>      |
| 48  | E2M8_112 <b>CLU1043</b>                                     |
| 49  | <b>CLU3850</b>                                              |
| 50  | Gh055                                                       |
| 51  | NAU3921 Gate3DE03                                           |
| 52  | A1792 Gate1AB09                                             |
| 53  | <b>NAU2202</b> CLU1059 HAU1666 <b>CLU72</b>                 |
| 54  | EM1OD32-155 <b>BNL0391</b> <b>Gh243</b> A1188               |
| 55  | CLU4607 <b>BNL3261</b>                                      |
| 56  | <b>CLU191</b> BNL0625 pAR179                                |
| 57  | Gate1BC03 <b>BNL1707</b> <b>NAU0943</b>                     |
| 58  | Gate3AH03 GhGAD CLU1387 DOW083                              |
| 59  | <b>NAU5419</b> Gafb21C08 P01_52 <b>pGH565</b>               |
| 60  | DPL0010 <b>BNL1673</b>                                      |
| 61  | E1M51-M95.0 E43M3-M238.0 Gate3CA02 pAR155 <b>pAR563</b>     |
| 61  | pGH540 <b>pGH565</b> HAU3165                                |
| 62  | CMS37 E7M4_222 <b>BNL2717</b>                               |
| 63  | Gafb29C08 UCD186 pAR10F10                                   |
| 64  | E5M1_227 Coau213                                            |
| 66  | P06_25 pAR244 Unig22H11 <b>BNL2709</b> Y2401                |
| 67  | DPL0204                                                     |
| 68  | ESTS146 <b>BNL2894</b>                                      |
| 69  | <b>DPL0139</b> <b>NAU2715</b>                               |
| 70  | Coau2114 UCcg10998_153 TMB1146 <b>Gafb28112</b>             |
| 71  | UCcg11087_206 <b>CLU4312</b> E31M7-M129.6 M63 CIR148        |
| 71  | ESTS105 TMB2789 E1M2-M401.1                                 |
| 72  | E1M6_162 E1M6_500 <b>BNL1679</b>                            |
| 73  | <b>Gafb28112</b> Unig24G11 CLU4443                          |
| 74  | DPL0400 <b>CLU5</b> NAU1151                                 |
| 75  | Gate2BD04                                                   |
| 76  | CLU3847 HAU0107                                             |
| 77  | CLU830 pAR04_13 CLU260                                      |
| 78  | HAU1828 Gh312                                               |
| 79  | Y2482                                                       |
| 80  | BNL3865                                                     |
| 81  | P11_23 Unig24C11 <b>JESPR121</b> <b>NAU5047</b> TMB1321     |
| 82  | <b>NAU3713</b> HAU0153                                      |
| 83  | HAU0154 <b>CIR081</b>                                       |
| 84  | <b>A1710</b> Gate4CG06                                      |
| 85  | NAU0915 <b>CLU93</b>                                        |
| 86  | pAR999                                                      |
| 87  | <b>CM85</b> <b>CLU134</b> HAU1454                           |
| 87  | UCcg11300_220 pAR229 pGH724 NAU5204 A1111                   |
| 88  | G1283 Gate1AE09 Gate1BE09 Gate1DC11 Gate4BG06               |
| 88  | pAR04_14                                                    |
| 89  | NAU3160                                                     |
| 90  | NAU2672 CLU1617 E5M4_240 E5M3_81 <b>NAU2640</b>             |
| 90  | Coau1E07 Gate1CB04 pAR183                                   |
| 91  | HAU0717 <b>NAU2671</b> <b>NAU2868</b> <b>BNL3537</b>        |
| 92  | CLU61                                                       |
| 93  | A1583 Coau4K03 Gate1CE12 pVNC098 <b>BNL0598</b>             |
| 94  | DPL0531                                                     |
| 95  | MUSS076 CIR302 <b>CLU2064</b> BNL3414 Unig25D04             |
| 96  | TMB0537                                                     |
| 97  | A1310 coau2I09 <b>CLU1371</b>                               |
| 98  | CLU920 <b>A1252</b> pAR03_21                                |
| 99  | NAU0445 CLU623 Gate2BG06                                    |
| 100 | Gate1DA06 Gate4CA11 Unig28B06 HAU1568                       |
| 101 | Y1334-480                                                   |
| 102 | pGH492 <b>CIR362</b> Coau2I09                               |
| 103 | pGH829 <b>pAR03_42</b>                                      |
| 104 | <b>NAU3778</b>                                              |
| 104 | HAU2748                                                     |
| 105 | CLU1009 CLU1508 pAR006                                      |
| 106 | CLU1597                                                     |
| 108 | CLU1471                                                     |
| 110 | <b>NAU1301</b>                                              |
| 111 | BNL1441 CIR042                                              |
| 112 | <b>BNL4059</b> pGH711 PXP2_75 <b>CIR272</b>                 |
| 113 | NAU3519 <b>CLU2020</b> pAR175 <b>A1614</b> Coau2A18         |
| 113 | Unig23F10 Unig28B12                                         |
| 114 | HAU0211 <b>BNL4059</b> pAR101 pVNC280                       |
| 115 | HAU0780 CLU184                                              |
| 119 | HAU0295                                                     |

# c13

|     |                                                              |
|-----|--------------------------------------------------------------|
| 0   | CLU266                                                       |
| 2   | CLU1730                                                      |
| 7   | HSTV038 BNL1403                                              |
| 9   | Gate1AE09                                                    |
| 11  | TMB1638                                                      |
| 12  | BNL2906                                                      |
| 13  | CLU1116 <b>BNL0409</b>                                       |
| 14  | Gate1CB09 BNL1660                                            |
| 15  | E41M4-M315.6                                                 |
| 16  | HpAR01_30 NAU0856                                            |
| 17  | CLU1717 Y1306-200 BNL1707                                    |
| 18  | HpAR923 pGH544 NAU5110                                       |
| 19  | TMB2347 CLU493 NAU3723                                       |
| 21  | <b>BNL0243</b> BNL3254 HAU2414 <b>pGH351</b>                 |
| 22  | <b>NAU6699</b> NAU6582                                       |
| 23  | HpAR898 NAU6173                                              |
| 24  | HpAR674 CLU1624                                              |
| 26  | HUnig22B05 Unig23G12 UCcg10487_205                           |
| 27  | HpAR07B01 pAR282                                             |
| 28  | <b>CIR054</b>                                                |
| 30  | HWO2 CLU1765                                                 |
| 31  | HBNL0137 <b>CLU197</b>                                       |
| 32  | <b>NAU2094</b>                                               |
| 35  | Gh697                                                        |
| 36  | HNAU2730 <b>CLU445</b>                                       |
| 37  | HpAR01C10 pAR03A01 Unig25A01 CG10                            |
| 39  | HpAR454 HAU1779                                              |
| 40  | H1428 pGH393                                                 |
| 42  | CLU2781 BNL1652                                              |
| 43  | HY1336-400 E4M6_232                                          |
| 44  | E5M12-300                                                    |
| 45  | HCoau1J11 NAU3203                                            |
| 46  | HOD3OD22-215 MUSB0059                                        |
| 47  | HBNL3993 Gh055                                               |
| 48  | <b>BNL1421</b> G1258 Gate3BF08 Unig06G03 <b>NAU2094</b>      |
| 49  | <b>BNL3558</b>                                               |
| 49  | <b>BNL1495</b>                                               |
| 50  | CLU180 E9M3-255                                              |
| 51  | E7M6_129 CIR135 E4M3_322 E4M1_470 CIR380                     |
| 51  | CLU4611                                                      |
| 52  | Gate3BB11 <b>CIR342</b> MUSB1188                             |
| 54  | DPL0763 <b>CIR020</b> DC1SA18-100 TMB0635 E43M4-M362.3       |
| 54  | HAU2558                                                      |
| 55  | CLU1427 Gate1BA05 Unig23E07 me1SA9-155 CLU2703               |
| 56  | pXP3_26 <b>Gh678</b> EM2GA45-140 E7M1_74 Gh092               |
| 57  | Gh133 TMP01-200                                              |
| 58  | <b>CIR406</b> CLU130 MUSS010 CIR096 me2em3-300               |
| 58  | <b>BNL2652</b> Coau2A15 Coau2A22 Coau3B11 Gate3CA10          |
| 59  | pVNC218 BNL4007 DPL0754                                      |
| 59  | <b>CLU2952</b> TMI15-185 E5M6_115 JESPR175 pAR958            |
| 59  | pVNC256 JESPR163                                             |
| 60  | CG16 OD3GA38-100 Gate4DG12 PXP3_25 E7M4_198                  |
| 60  | CLU52 E8M4_247 E1M2-M145.5 TME17-160 E3M54-M406.8            |
| 60  | <b>pAR04_39</b> CLU1982 MUSB0818 CIR291 <b>BNL1438</b>       |
| 61  | BNL3472 E3M3_68 MUSS550 CIR235                               |
| 61  | UCcg10682_477 BNL1747 E2M2_510 JESPR201 E7M1_186             |
| 61  | TMB2108 BNL3623 TMB0403 E2M6_70                              |
| 62  | <b>CLU18</b> Gate4BE04 em6PM18-105 CLU2970 CLU3512           |
| 62  | TMB2051                                                      |
| 63  | TMB1216 E1M51-M185.2 MUSB0958 E6M5_195 E1M5_260              |
| 63  | E3M2_187 E3M6_240 E2M2_450 MUSB0550 E41M4-M100.5             |
| 64  | <b>MUSB0972</b> Y1031 CIR079 NAU2975 <b>CLU3989</b>          |
| 64  | HAU1091 CIR027 <b>NAU1023</b> <b>BNL1394</b> Gh215           |
| 65  | GW60-390                                                     |
| 65  | <b>NAU3570</b> <b>CLU2268</b> <b>CLU2642</b> NAU6185 CLU1873 |
| 65  | <b>MUSB1263</b> GW61-395 <b>NAU3989</b> NAU0817 NAU3079      |
| 66  | <b>NAU3307</b> E8M4_99 CIR012                                |
| 67  | CLU1310 NAU3522 em5DC1-150 JESPR016 E3M7_370                 |
| 67  | CIR338 MUCS250 BNL0234 E1M51-M347.1 E42M4-M259.5             |
| 67  | MUSB0399 JESPR153 Coau2A19 Coau2K17 <b>G1125</b>             |
| 67  | Gate3CC08 PXP1_69 PXP2_25 E3M3_410 E5M7_183                  |
| 68  | NAU2871 <b>BNL4029</b> E2M6_305 E3M3_208 Y1313-750           |
| 68  | HAU1513 UCcg10411_565 E5M1_85 BNL1555                        |
| 69  | E4M1_97 Gate2CF08 E6M16-160 <b>DPL0635</b> pAR416            |
| 70  | E8M8_63 NAU2938                                              |
| 71  | CLU1621 CG26 A1713 <b>BNL3479</b> E12M6-310                  |
| 71  | TMB0794                                                      |
| 72  | E4M7_210 CLU252                                              |
| 73  | <b>NAU3468</b> F18                                           |
| 74  | H9M6-210 pAR934                                              |
| 75  | <b>CLU1709</b> UCcg10264_238 TMB0820                         |
| 77  | TMB2960 NAU2300 Coau1H06 E1M5_215                            |
| 78  | P05_11                                                       |
| 79  | HUnig23D05 E10M6-125                                         |
| 81  | TMI15-330 <b>CLU321</b> BNL4064                              |
| 82  | HAU1389 TMB1767 CLU832 NAU5392 JESPR204                      |
| 83  | Gh501 <b>BNL0569</b> <b>pAR274</b>                           |
| 84  | Gate3DA09 Unig06C10 Unig22A02 Gate2AB07 NAU2893              |
| 85  | Gate1AG05 Unig22D09 Y4004-3100 TMB0312                       |
| 86  | HAU0539 <b>NAU5345</b> pAR01_20 pAR08E06 TMB2904             |
| 87  | CLU1761 <b>CLU1708</b>                                       |
| 89  | <b>CLU131</b>                                                |
| 90  | JCM160 pAR413 Gate1CD12 Gate4CD04 P11_16                     |
| 90  | pAR06C06                                                     |
| 91  | <b>CIR040</b> UCcg11073_51 Gate2CB12 E4M8_150                |
| 92  | Gate1BH05 Gate3CA11 MUSB0450                                 |
| 93  | BNL2667                                                      |
| 94  | HAU1997 A1208 pAR755 Unig25G07                               |
| 95  | NAU3540 BNL4061 Gate1AE07 Gate4CG09 pAR265                   |
| 96  | pAR338 <b>pAR788</b> W11                                     |
| 96  | <b>CLU2792</b> Coau2C17 pAR856 PVNC095 Gh034                 |
| 97  | HUnig26B12 <b>CLU2792</b>                                    |
| 98  | <b>CLU2832</b>                                               |
| 100 | <b>BNL2571</b> pAR04E08 Unig22C08 HAU3035                    |
| 101 | Unig24B05                                                    |
| 102 | E5M8_400                                                     |
| 103 | A1835                                                        |
| 105 | HNAU2038 MUSB0685 HAU2792 Gate1BG08                          |
| 108 | A1520 Coau2L11 pAR238 pGH690                                 |
| 109 | Gate2BG10 Gate4BC11 Unig22B01 Unig25A05                      |
| 112 | Gate23B18 Gate3AH03 <b>pAR601</b> Gate1AD04                  |
| 113 | Gate1CF04 Gate4BF10 Coau2J11 Coau2K07 Gate4DB12              |
| 114 | Gate4BC01 A1417 <b>A1552</b>                                 |
| 116 | NAU2765                                                      |
| 118 | HAU2977                                                      |
| 119 | E12M6-110 Gate2BF11 CIR188                                   |
| 120 | G1115                                                        |
| 121 | NAU3991                                                      |
| 123 | CIR057 MUSB1135                                              |
| 124 | <b>NAU2285</b>                                               |
| 126 | CLU1464 E7M3_370                                             |
| 128 | NAU0464                                                      |
| 129 | CIR095                                                       |
| 131 | <b>BNL3281</b>                                               |

# c14

|     |                                                            |
|-----|------------------------------------------------------------|
| 0   | CLU3518 NAU0895                                            |
| 3   | DPL0510                                                    |
| 7   | BNL0834                                                    |
| 9   | G1124 pAR492                                               |
| 10  | BNL0236 Coau3L11 pAR175 pGH374 pGH678                      |
| 12  | TMB0836 TMB1393 DPL0473 <b>CLU49</b>                       |
| 13  | CIR295 CLU2114 TMB0135 <b>CIR292</b>                       |
| 14  | <b>CIR292 CIR097</b>                                       |
| 15  | <b>NAU2960</b>                                             |
| 20  | <b>CIR202 CAC263</b>                                       |
| 21  | HAU0167 <b>CIR228</b> Gate3CC01                            |
| 22  | HAU3573 Gate1DG04                                          |
| 23  | <b>CIR084</b>                                              |
| 24  | pAR288 <b>NAU1070</b> Gate3BB01 Gate3CG08 Unig28A12        |
| 25  | <b>JESPR231 JESPR231</b>                                   |
| 26  | <b>NAU5027</b> At09                                        |
| 27  | <b>NAU6486 pAR355</b> CLU950                               |
| 28  | Unig28F05 <b>NAU3820</b>                                   |
| 29  | <b>BNL3259</b>                                             |
| 31  | <b>NAU2190</b>                                             |
| 32  | E7M1_178                                                   |
| 33  | <b>CLU749</b> pAR325                                       |
| 34  | <b>G1129</b> Gate1CC07 Gate2DG04 Gate4DG03 pXP3_89         |
| 35  | HAU2127 E43M52-M182.3                                      |
| 36  | CLU3917                                                    |
| 37  | FbL2A <b>CLU4882 NAU3598</b>                               |
| 38  | Gate2BB02 pAR307 <b>pAR815</b> pVNC201                     |
| 39  | <b>NAU3214</b>                                             |
| 40  | MUCS459                                                    |
| 42  | G1164 <b>NAU4022 NAU5027</b> CIR263                        |
| 43  | <b>NAU1070</b> E5M15-700 UCD289 E5M15-130                  |
| 44  | CLU1483 DPL0405 <b>A1727</b> G1044 M16_161                 |
| 45  | UN1121 DPL0354 <b>NAU0998</b>                              |
| 46  | CLU2785 UCD235 <b>JESPR161</b> NAU6236 BNL4017             |
| 47  | CLU190                                                     |
| 48  | <b>NAU2173</b>                                             |
| 49  | <b>BNL3533</b>                                             |
| 50  | <b>CIR202 G1147</b>                                        |
| 51  | A1167 <b>BNL3034</b> pAR955 pGH699 W07                     |
| 52  | HAU2272 <b>CLU1491</b> Gate4DA02 DPL0901                   |
| 53  | <b>Gh471</b> CLU1191                                       |
| 54  | <b>CIR239 CLU4293</b> NAU3913 NAU2901                      |
| 55  | BNL0226 ESTS175 BNL0244                                    |
| 56  | UCD540 NAU0803 P01_45                                      |
| 57  | HAU6474 E3M2_76 NAU6692 NAU6628                            |
| 58  | pAR216 JESPR147                                            |
| 59  | HAU1057 pAR01_36 JESPR006                                  |
| 60  | A1449                                                      |
| 61  | <b>BNL1607</b>                                             |
| 62  | Coau4E21 NAU6475 TMB2938                                   |
| 63  | E3M52-M261.2 HAU1527 TMB0607 CLU1968 A1222                 |
| 64  | Unig06F11 JESPR263                                         |
| 65  | TMB0324 E7M4_360 TMB0594                                   |
| 66  | TMB0803 BNL3834 TMB1687                                    |
| 67  | Coau4F01 Gate3BE11 pAR249 Unig28C12 E3M5_164               |
| 68  | Gh051                                                      |
| 69  | CLU924 <b>TMB1174</b> NAU3239 MUSB0337 E3M4-M314.7         |
| 70  | <b>NAU6416</b> CMS17 Gate4DC02 DPL0242                     |
| 71  | Gh462 BNL3033 UCoot10397_424 CLU3839 BNL0519               |
| 72  | BNL3267 Unig25B10                                          |
| 73  | P09_53 G34A3-3 Gate1CD07 pAR04F10 Y12911                   |
| 74  | TMB1348                                                    |
| 75  | TMB1513                                                    |
| 76  | Gate4A05                                                   |
| 77  | E2M4_440 Gh067 ME8SA17-480 E41M1-M326.0 DOW074             |
| 78  | <b>CIR288</b> NAU2987 <b>CLU1253 BNL2882</b> pAR056        |
| 79  | TMJ09-270 HAU1219 NAU6316 <b>NAU3119</b> BNL3523           |
| 80  | <b>BNL3443</b> NAU3312                                     |
| 81  | BNL3477 LXP43 HAU2537 CLU14 pGH551                         |
| 82  | <b>NAU3308</b> NAU2712 DPL0871 <b>BNL3443</b> HAU0438      |
| 83  | <b>NAU3691</b> NAU4065 CLU73 E3M2_199 ESTS154              |
| 84  | NAU3439 NAU3816                                            |
| 85  | <b>CIR181</b> E8M3_175 <b>BNL1059</b> E43M54-M430.0 pGH442 |
| 86  | Coau1J10 <b>NAU6623 BNL3145</b> E43M2-M131.9 A1497         |
| 87  | <b>A1148</b> NAU2929 MUSB1035 <b>BNL3502</b> Coau1L22      |
| 88  | Gate4AD09 P02_35 pAR358 pGH812 HAU1049                     |
| 89  | <b>NAU3485 NAU4024</b> HAU2046 CIR058 HAU1980              |
| 90  | E13M13-230 CLU1731 GhSAMS MUCS318 HAU0133                  |
| 91  | <b>NAU2633 NAU6486</b> CIR047 BNL2651 NAU3189              |
| 92  | HAU0883 NAU3648 <b>NAU3885 CLU135</b> E42M2-M327.1         |
| 93  | E6M1_197 TMB0921                                           |
| 94  | E43M54-M226.6                                              |
| 95  | <b>JESPR165</b> NAU1529                                    |
| 96  | pAR01_22                                                   |
| 97  | pAR945 CLU2758 pAR06C03                                    |
| 98  | BNL3888 Gate3CD02 <b>pAR545</b>                            |
| 99  | PXP4_65                                                    |
| 100 | Gate1BE06 Gate4CA07 Gate4DB08 pAR04E07 pAR470              |
| 101 | E3M8_500                                                   |
| 102 | E43M3-M69.6 pAR07F02                                       |
| 103 | <b>CLU4561</b> JESPR179                                    |
| 104 | BNL2443 TMB1268                                            |
| 105 | HAU1455 DPL0017 G1210                                      |
| 106 | Y1282                                                      |
| 107 | BNL1897                                                    |
| 108 | <b>Unig25A02</b> NAU5490                                   |
| 109 | CIR030 JESPR037                                            |
| 110 | MUSB1034 Gate1AD07 Gate3CC11                               |
| 111 | Y1806                                                      |
| 112 | E1M54-M286.9                                               |
| 113 | CIR381                                                     |
| 114 | <b>Gate3BF06 Gate4BD11</b> pAR932                          |
| 115 | G1012                                                      |
| 116 | NAU3209 <b>NAU3733</b> At03 C102 P05_06                    |
| 117 | <b>pAR451</b>                                              |
| 118 | pAR723                                                     |
| 119 | pAR129 E3M2-M99.2 A1580 Coau4N12 <b>Gate3BF06</b>          |
| 120 | HAU1485 E4M2_500                                           |
| 121 | CLU618 DOW055 E1M1_213                                     |
| 122 | E1M54-M195.2                                               |
| 123 | E1M2-M74.2 MUCS582                                         |
| 124 | CLU1881 Gate1CB10 <b>Gate4BD11</b> pAR043                  |
| 125 | <b>CLU4635</b> BNL1510 GW70-245 <b>NAU5467</b>             |
| 126 | TMB1931 <b>NAU5499</b> TMB2386                             |
| 127 | Unig28C03                                                  |
| 128 | <b>NAU3585 Unig25A02</b>                                   |
| 129 | Y1348-650                                                  |
| 130 | CLU40                                                      |
| 131 | <b>CIR246</b> TMB0071                                      |
| 132 | Gate1AG12 DPL0538 HAU0008                                  |
| 133 | HAU6106 Gate3BF01                                          |
| 134 | <b>BNL3644</b>                                             |
| 135 | HAU3903 <b>JESPR156</b>                                    |
| 136 | Gate2AA09                                                  |
| 137 | BNL1403                                                    |
| 138 | ESTS152                                                    |
| 139 | pAR582                                                     |

# c15

0 | pAR01\_14 pAR641  
7 | HARR1001 pAR784  
9 | A1126  
13 | H CMS21 Gate1DH11 Gate4DB12  
14 | Cafb14K15  
20 | Unig25B04  
23 | NAU2437  
26 | DPL0302 TMB1910 **CIR009**  
27 | NAU6095  
28 | H NAU1487 MUSB0537 NAU2015  
29 | H NAU0096 NAU5138 **CLU526 CLU2788**  
30 | H **CLU2801** CLU721  
31 | H CLU2984 HAU0059 MUSS572 HAU0077  
32 | **BNL2440**  
33 | H HAU0080 NAU0461 NAU1495  
34 | Gate3BD01  
36 | CLU1820  
37 | H HAU2936 MUSS085  
39 | Gate4AH09  
40 | Gh565  
43 | H **CLU1520** A1485  
44 | H E7M5\_121 NAU2343  
45 | H M151 CLU16  
46 | **JESPR152**  
47 | H DPL0402 CLU2074  
49 | H **CLU4132 G1051**  
50 | H **G1051 NAU2901**  
51 | CM76  
52 | H Gate4CD05 NAU2823  
54 | Gate3C02  
58 | **JESPR298**  
61 | IP02\_58 **pAR019** pAR475 pGH549 Unig26G08  
H AUJ2861  
62 | pGH624  
63 | **BNL1454**  
64 | H E6M8-140 JESPR297 Unig22D04  
65 | E6M1-260  
66 | H **DPL0318** NAU6351 DPL0542  
67 | H E1M1\_174 TMB1492 DPL0182  
68 | H MUSB0325 pAR01G03  
69 | H TMB1664 NAU3530 E3M4-200  
70 | **CIR307** CIR334 Ghmyb9 Y1295 CLU4602  
H TMG11-225 TMF12-195 NAU6584 **CLU29 NAU3736**  
71 | H TMB0323 TMF012 **NAU3433** pAR775 pAR906  
pAR957  
72 | H E6M4\_392 TMB0201 TMB1633 E4M7\_540  
73 | pAR405 pBAM291 **Unig26F09** TMG011 MUSB0309  
BNL2700 **NAU3496** E2M8\_275  
74 | **NAU3188 MGHES59** DPL0110 MUSB1079 CG10  
H MUSB0440  
75 | A1225 pAR607 MUSB0664 TMB0585 BNL3101  
Gate1CD07 Gate4AH11  
76 | CIR015 **BNL0162 BNL4082 DPL0322** NAU1521  
**JESPR298** E6M5\_113 **JESPR180 JESPR205** pGH248  
77 | H TMB0301 BNL3652 MUSS322 **NAU3178 DPL0300**  
CLU92 **CLU1495** CLU2747 **BNL1666** TMH08-245  
H MUSB1267 A1583 TMB2931 **A1109** A1588  
A1738 PBAM286 TMB0924 Coau2E14  
78 | **DPL0615** Unig22C02 **BNL2646** NAU3882 E43M53-M51.8  
E1M6\_140 CIR411 E5M8\_152 CIR143 Unig27E09  
H JESPR063  
79 | H MUSB0818 CLU132 **CLU4227** E1M51-M103.8 E43M4-M292.7  
CLU113 CLU2853 UCcot10423\_733 Y2721-3000 E43M52-M326.0  
CLU303 UCcot10423\_654 **CLU2744 CLU3973** JESPR024  
E6M2\_144  
80 | H E31M2-M347.4 **CLU1355** NAU3690 UCcg10176\_75 UCcg10176\_107  
TMB0375 **BNL3902** A1720 pAR011 pVNC094  
81 | **NAU6459 NAU2165** CIR234 DPL0467 Gate1BB12  
BNL2664  
82 | H DOW039 MUSS523 TMN20-210 DPL0854 TMB1869  
DPL0264 MUSS012 MUSS325  
83 | H NAU5402 **BNL1350** Coau2L06 HAU3351 Gate3BC09  
DOW089  
H NAU6624 P01\_03 P05\_39 **CLU435** E3M52-M284.9  
84 | A1686 P05\_32 pAR088 **Unig24B11**  
**CLU3234**  
85 | H OD3OD22-295 **NAU5235 CLU5488** pAR09B03 BNL3085  
87 | H DOW081 NAU3337 Gate4BE06 DPL0887  
88 | **BNL3090** HAU2490 NAU0422 BNL4095 pGH273  
89 | **A1553** Unig25A07  
90 | H **CLU700** Unig28E05  
91 | **BNL3090** PVNC142  
92 | H **CLU325** HAU1427 NAU5085  
94 | H MUSS090 Gate1BA10 **NAU5172**  
95 | A1340 pGH661  
97 | NAU3576  
100 | H E42M4-M164.2 **BNL0786** CLU105  
101 | TMB0283  
102 | BNL0830  
103 | me2em2-60  
104 | TMB0119  
106 | H **CLU174** CLU512  
107 | H **NAU3056** NAU3057 TMB0694  
108 | H TME03-175 NAU6468  
109 | **NAU4073**  
111 | H **CIR311** CLU1534  
112 | DPL0051  
113 | H E2M3\_255 P05\_31 NAU2419  
117 | **CLU2959**  
118 | H Gate1AH09 **CLU1023** CIR158  
119 | H BNL3345 HAU0940  
121 | H CLU486 E8M3\_132  
122 | E31M55-M109.0  
124 | H AUJ1001  
125 | E2M7\_400  
127 | A1643 **pAR077** pGH468  
128 | **CIR105**  
130 | H CLU1349 BNL2664  
131 | pAR245  
132 | CLU1573  
133 | E4M1\_81  
134 | H AUJ1619  
135 | CLU4240  
136 | **CLU868**  
138 | H MGHES43  
142 | **BNL1688** Gate4DA07 pAR959  
144 | E1M3\_182  
145 | DPL0504  
147 | Gate4BD03  
149 | H NAU3543 CLU1183  
150 | H **CLU868** CLU878  
153 | H Unig22C01 NAU1067  
160 | **CIR110**  
161 | H pAR935 PXP3\_42 Unig25B08  
162 | NAU0458  
170 | H Gate2BG02 **Unig26F09**  
171 | H Coau1O13 Unig25D08  
176 | H Coau1M01 Coau2M13 Gate1AB12  
183 | M16\_078  
194 | pAR883  
195 | pAR099  
206 | H Gate1BG09 **Unig24B11**  
211 | **A1553**  
218 | pAR09D01  
222 | H **CLU5488** pAR08E03  
231 | Coau2E03

# c16

|     |                                                                |
|-----|----------------------------------------------------------------|
| 0   | E5M4_480                                                       |
| 3   | pAR04_09                                                       |
| 4   | MUSB0958                                                       |
| 7   | A1619 P01_24 CLU1647                                           |
| 8   | CMS26                                                          |
| 10  | P12_16                                                         |
| 13  | Gate1CB11 A1826                                                |
| 15  | Unig26E07                                                      |
| 18  | HAU1399                                                        |
| 21  | HAU2662 BNL3065                                                |
| 24  | pAR544 pAR844                                                  |
| 26  | DPL0800                                                        |
| 28  | CLU2012 TMB2068 <b>NAU3279</b>                                 |
| 30  | <b>NAU0966 NAU3678</b>                                         |
| 31  | <b>NAU3906</b> NAU3608                                         |
| 32  | NAU2286                                                        |
| 33  | DPL0283 <b>NAU2556</b>                                         |
| 34  | CLU4086 <b>NAU2733 NAU2974</b> NAU3911                         |
| 36  | <b>BNL1604</b> CLU756 <b>BNL2734</b>                           |
| 37  | G1271 CLU1104 pAR714                                           |
| 39  | MUSB1018 pAR173 PXP4_52                                        |
| 40  | M16_106 At55 E4M15-200 E31M53-M313.4                           |
| 41  | <b>Gh002</b> Unig06D05                                         |
| 42  | <b>JESPR297</b> MUSB0632 Gh073                                 |
| 43  | DPL0168 DPL0385                                                |
| 44  | NAU2640 DPL0897 <b>NAU3180</b>                                 |
| 45  | P32 CLU38 ESTS183 TMB2566 TMB1114                              |
| 46  | NAU6136 TMB0180                                                |
| 46  | TMB0009 TMB09-170 DPL0048 DPL0061                              |
| 47  | <b>NAU6664</b> pAR161 <b>NAU6375 BNL1026</b> BNL2766           |
| 47  | GW36-590                                                       |
| 48  | BNL1551 BNL3090 CMS14 pAR040 <b>pAR173</b>                     |
| 48  | pAR285 pAR291 pAR887 Unig23A09 Unig25G01                       |
| 49  | CM66                                                           |
| 49  | <b>NAU6326</b> Coau4E21 Coau4B05 pAR231 NAU6310                |
| 49  | STV007 BNL1395                                                 |
| 50  | HAU1145 NAU4017 NAU4943 NAU6430                                |
| 51  | <b>BNL2441</b> Gate4CB01 E1M4-M215.4 CLU4705 CLU178            |
| 52  | A1311 <b>BNL1694</b> pAR402 pAR512 pAR579                      |
| 52  | Unig28E03 Unig28G08                                            |
| 53  | E5M1_140 DPL0287 A1437 Coau3J21                                |
| 54  | HAU1764                                                        |
| 55  | NAU6634 <b>JESPR228</b> HAU0137                                |
| 57  | pAR979 pGH267 <b>JESPR237</b> HAU2162 E7M6_97                  |
| 57  | <b>Gh055</b> NAU5325                                           |
| 58  | <b>NAU5061</b> E1M51-M288.0 E3M5_170 <b>MUSB1181</b> HAU1527   |
| 60  | <b>DPL0342</b> NAU3196 BNL3319 MYB4                            |
| 61  | CLU8 <b>CLU303</b>                                             |
| 62  | <b>JESPR128</b>                                                |
| 63  | BNL3287 Gate4BG08 P02_64 <b>TMB1820</b>                        |
| 64  | TMB1271                                                        |
| 65  | Gate2DD02                                                      |
| 67  | Gate1AH04                                                      |
| 68  | <b>CLU3976 Gh055</b> pAR03C09 BNL3799                          |
| 69  | NAU2626 G1261 pAR324                                           |
| 70  | pAR330 pAR825 <b>BNL2986</b>                                   |
| 71  | HAU1669                                                        |
| 72  | A1429 <b>BNL0580</b>                                           |
| 73  | pAR197 Gate4AE08 DOW077                                        |
| 74  | E3M4_115                                                       |
| 75  | PVNC030 CLU2524                                                |
| 76  | <b>CLU303 A1182</b>                                            |
| 77  | Gate2BF11 <b>CIR100</b>                                        |
| 78  | NAU2186                                                        |
| 79  | Unig23G04 <b>MUSB1181</b> Coau3C04 Gate1AG04                   |
| 80  | <b>BNL3008</b> E4M6_312 <b>NAU2627</b> pAR295 pAR869           |
| 80  | E31M7-M86.9 E3M52-M246.9 <b>NAU0751</b> NAU2881 <b>NAU2628</b> |
| 81  | E43M52-M387.4 CLU2102 <b>BNL2734</b>                           |
| 81  | NAU6259 pAR06A09 <b>NAU2620</b>                                |
| 82  | me4em3-220 <b>NAU3594 NAU5408</b>                              |
| 83  | pAR624 HAU1195 NAU3676 <b>CLU1166</b> HAU1520                  |
| 84  | <b>CLU4112</b> pAR564 pGH408 CLU622                            |
| 85  | E4M2_129 <b>DPL0511</b>                                        |
| 86  | Coau2G19 P03_02 HAU1836 <b>NAU2721 CIR107</b>                  |
| 87  | Unig25B05 JESPR222                                             |
| 88  | BNL2634                                                        |
| 89  | <b>NAU4956</b> Gh345                                           |
| 90  | BNL1964 pAR997 BNL1531                                         |
| 91  | BNL3793 NAU0450                                                |
| 92  | UCog11051_93 <b>CLU4153</b> CLU1749                            |
| 93  | NAU6468 <b>MUCS616</b> BNL1706                                 |
| 95  | CLU917 MUSB0812 E9M3-90                                        |
| 96  | ESTS126 Gh056                                                  |
| 97  | pAR139                                                         |
| 98  | NAU3939 BG447405                                               |
| 99  | CLU697 Gafb22L22                                               |
| 100 | <b>DPL0501</b>                                                 |
| 101 | <b>JESPR292</b> Gate3BA10 Gate4BF05 pAR656 pAR662              |
| 101 | pAR720 Unig26G08                                               |
| 102 | CLU208 HAU0120 <b>NAU5152</b>                                  |
| 104 | CG02                                                           |
| 105 | <b>NAU3053</b>                                                 |
| 107 | CLU3837 Coau1K20 Gate1AB03                                     |
| 108 | A1620 <b>G1158</b> HAU3104                                     |
| 112 | <b>BNL1022</b>                                                 |
| 114 | E2M6_85 CLU1419 HAU3082                                        |
| 115 | E41M1-M77.8 MGHE576 <b>NAU1020</b>                             |
| 116 | E1M51-M97.0 NAU0493                                            |
| 118 | Ghmyb36 NAU3004                                                |
| 119 | E3M4_370 E1M54-M260.0                                          |
| 120 | <b>MUSS095</b> <b>CLU4048</b> pAR934                           |
| 121 | <b>CLU73</b> pAR763 <b>NAU3459 NAU3486</b>                     |
| 123 | <b>NAU3550</b> DPL0364 Unig24E11                               |
| 124 | pGH574 MYB38 UCD154                                            |
| 126 | <b>Gate4CF04</b>                                               |
| 129 | NAU3424 <b>Gate4CF04</b>                                       |
| 131 | NAU3003                                                        |
| 140 | E3M6_295                                                       |





# c18

|     |                                                            |
|-----|------------------------------------------------------------|
| 0   | pAR03C02                                                   |
| 3   | ME8GA2-95                                                  |
| 7   | <b>TMB2762</b> CLU1082                                     |
| 8   | <b>Gate1DG03</b> CLU493                                    |
| 9   | E4M2_140 <b>NAU6582</b>                                    |
| 10  | pAR08A04 pAR952 <b>pGH351</b>                              |
| 11  | NAU3685 pAR04B07 pAR923                                    |
| 12  | pAR898 CLU1624 <b>pGH351</b> NAU6426                       |
| 13  | <b>Gate1DG03</b> Gate4DF08 <b>BNL0243</b>                  |
| 14  | Unig06H02 NAU6378                                          |
| 17  | W02                                                        |
| 21  | NAU3943                                                    |
| 22  | <b>NAU3011</b>                                             |
| 23  | pAR756                                                     |
| 25  | A1536 <b>BNL2544</b> P09_53                                |
| 26  | <b>BNL0193</b> CLU1577                                     |
| 28  | HAU0100 NAU2094 Gate3BF08 Unig06G03                        |
| 31  | <b>MUSB0984</b> <b>Coau2L21</b>                            |
| 32  | TMB1501                                                    |
| 33  | <b>NAU2697</b>                                             |
| 34  | <b>Gate4AA05</b> Gate1AA03                                 |
| 35  | Coau2117 Coau1J12 <b>Coau2L21</b>                          |
| 36  | Gh142 <b>NAU3203</b> CLU749 Unig27E11                      |
| 37  | CLU686 Unig22H07 Unig24C06                                 |
| 38  | HAU0083 E43M3-M124.8 pAR454 <b>Gh525</b>                   |
| 39  | Unig22B10                                                  |
| 40  | <b>Gate4AA05</b> <b>CLU180</b>                             |
| 41  | GW16-180 <b>BNL3558</b> BNL3579 CLU1761                    |
| 42  | <b>CLU1708</b> <b>CLU199</b> P06_49                        |
| 43  | At17 Gate3BB11 DOW086                                      |
| 44  | E3M4_350 <b>CIR020</b>                                     |
| 45  | E5M5_98 Gate4BD10                                          |
| 46  | Gh678 E14M4-320 E6M5_120 E3M7_225 HAU2675                  |
| 47  | JESPR007 E2M7_520 Gate2DE11 <b>Gate4DG12</b> Unig28C01     |
| 47  | W13 <b>BNL2652</b> UCcg11239_151 E3M6_390                  |
| 48  | CLU327 DPL0033 Gate2BC10 pGH576                            |
| 49  | NAU4102                                                    |
| 50  | MUSS544 CLU1664 <b>NAU6682</b> PXP2_25 <b>Gate4DG12</b>    |
| 50  | <b>CLU4611</b> MUSB0564 E6M5_79 <b>Coau1J14</b>            |
| 51  | BNL4079 E6M2_79 TMB0114 Y2459 A1364                        |
| 51  | A1591 A1647 Coau2E05 Unig23B06 E1M2_175                    |
| 51  | JESPR130 E43M3-M144.5 CS059                                |
| 52  | TMB0232 E6M8_152 TMB04-220 CM63 PXP1_11                    |
| 52  | E5M3_113 E43M2-M215.5 BNL2471 E1M4-M279.7 G1125            |
| 53  | <b>BNL1079</b> Gate3AH03 E3M2-M81.8 <b>BNL1721</b> NAU2138 |
| 53  | TMB1603 <b>NAU3534</b>                                     |
| 54  | MUSB1263 CLU169 TM115-175 Y1283 E43M52-M407.4              |
| 54  | TME17-145                                                  |
| 55  | CIR040 JESPR167 HAU3061 DOW094 <b>NAU3816</b>              |
| 55  | DPL0049                                                    |
| 56  | NAU2772 E31M55-M415.3 <b>NAU3211</b> A1713 Gate3DB03       |
| 56  | pAR046 pAR964 CIR235 NAU2598 E2M8_400                      |
| 56  | JESPR016 CLU1780 <b>JESPR153</b> TMB1809 <b>BNL3445</b>    |
| 57  | <b>BNL3445</b> <b>BNL3280</b> CIR012 BNL4029 NAU3079       |
| 58  | <b>BNL3479</b> pAR614                                      |
| 59  | NAU5387 em4DC1-220 Unig24A07                               |
| 60  | ME8GA18-400 <b>Coau1J14</b> TMB1208                        |
| 61  | TMB1231 E7M5_185                                           |
| 62  | BNL1040 <b>CLU3982</b> CLU1310                             |
| 63  | NAU5392 CG09 me4em3-380                                    |
| 64  | TMB1767 E3M1_154 NAU3699 E3M8_400                          |
| 65  | MUSB0685 pAR532 Y1321-180                                  |
| 66  | TMB0029 Gate1BH07 Gate3BG09 Gate3CC03 DPL0807              |
| 67  | Gate4BC10 Gate4DE08 Unig06C10 <b>CLU202</b> CG25           |
| 68  | Gate1AB08 Unig25C06 Gate1AG05                              |
| 69  | DOW006 Coau3D08                                            |
| 70  | pAR274 Unig22A02 Unig22F12 DPL0229 <b>BNL0569</b>          |
| 71  | <b>JESPR056</b> pAR413 <b>NAU5364</b>                      |
| 72  | <b>CLU1708</b> Gh055 TMB0834 NAU5109                       |
| 72  | <b>Gate1CD12</b> Gate4CG12 pAR04_13 pAR04_36 pAR06C06      |
| 73  | pAR310 pAR918 pARC_12 Unig28G09 DOW067                     |
| 73  | NAU0523                                                    |
| 74  | CIR277 <b>CLU3494</b> <b>NAU3232</b> E1M5_410 CLU1038      |
| 74  | MUSB1189                                                   |
| 75  | <b>CLU199</b> <b>CLU1709</b> MUSB1166                      |
| 76  | <b>CLU4370</b> <b>NAU3589</b>                              |
| 77  | <b>CIR099</b> pAR566                                       |
| 78  | E3M5_112 BNL2667 CLU4363                                   |
| 80  | CIR221                                                     |
| 81  | Gh501                                                      |
| 82  | Gate4CD04 pAR028 HAU1182                                   |
| 84  | CLU2792                                                    |
| 86  | NAU3447                                                    |
| 87  | CLU2622                                                    |
| 88  | <b>CLU4513</b> Coau2C17 pAR338 <b>pAR788</b>               |
| 89  | At51                                                       |
| 90  | CLU962 CLU1481 NAU3130                                     |
| 91  | E42M2-M364.9                                               |
| 92  | JESPR178                                                   |
| 93  | <b>JESPR204</b>                                            |
| 94  | CLU1024                                                    |
| 95  | <b>BNL2571</b>                                             |
| 96  | Gate2CC04 CLU4615 DPL0348                                  |
| 97  | CLU4212                                                    |
| 98  | NAU3080 CLU765                                             |
| 99  | NAU3827 CLU1663                                            |
| 100 | HAU1922 E8M8_140 DPL0910                                   |
| 101 | HAU0209                                                    |
| 102 | Gate24G24 CLU1207                                          |
| 103 | JESPR246 Coau4G12 Gate3DA02                                |
| 105 | NAU2980 NAU3991                                            |
| 106 | <b>MUSB1135</b>                                            |
| 108 | P01_19 P10_07 pAR947 DPL0547 Coau1H04                      |
| 109 | DPL0922                                                    |
| 110 | <b>CLU85</b> HAU1086                                       |
| 112 | TMB2295 A1520                                              |
| 113 | A1676 Gate4BC11                                            |
| 115 | BNL3281                                                    |
| 118 | Gate4BC01                                                  |
| 119 | E5M1-M-552.0 Gate4BF10 Unig22E01                           |
| 120 | A1417 <b>A1552</b>                                         |
| 121 | Coau1O05 Coau2K07                                          |

0 | **NAU3095**  
1 | HNAU30876 NAU0524  
2 | CMS21  
3 | **CLU1047** CLU4015  
4 |  
5 | -E43M54-M140.2  
6 | H-E43M3-M287.5 pAR182 NAU3649  
7 | HGateC207 Unig25H05  
8 | CIR344 **NAU3946**  
9 | HPAR09C12 E31M55-M139.5  
10 | HCLU145 Coau2A18 pAR1D01 **CLU3874** E1M6\_267  
11 | -E3M3\_420  
12 | HCAC278 CLU5084  
13 | H-TMB1391 TMB1437 pAR01G05  
14 | -E3M4\_164  
15 | -pGH559  
16 | -BNL0632  
17 | -Unig26D03  
18 | HGateC2N16 DPL0893  
19 | -CLU832  
20 | -JESPR023  
21 | HCLU1208 NAU3344  
22 | **pAR03\_41** pAR417  
23 | HNAU3268 **CLU3259** pAR03\_46  
24 | H-CIR277 BNL2821  
25 | -TMB1295  
26 | **CLU139**  
27 | **CLU32** CM51 DPL0788  
28 | **BNL3535** E3M3\_430  
29 | -CLU086  
30 | -DOW053  
31 | HPAR03H07 CG18  
32 | HNAU580977 pAR460  
33 | HBNL1706 MUSB1155 JESPR273  
34 | H-R6592A14DL Coau1A21 **BNL1671** E3M1\_205 MUSB0641  
35 | IE2M6\_103 MUSB1035  
36 | **BNL349** E11M6-440 **BNL3662** E8M8\_124 CLU1378  
37 | BNL4069 E43M52-M373.8 Exp1a-160 DC10D8-105  
38 | Y2273 **NAU6205** **NAU6318** **NAU6466** CLU4070  
39 | **NAU6105** Y2721-1500 NAU3652 BNL3422 CLU4022  
40 | BNL3576 UCcg10745\_248 BNL2749 **CIR255** **CIR179**  
41 | DPL0163  
42 | H-E4M7\_450 Coau4N12 CIR413 HAU0006 pAR334  
43 | -GH691  
44 | HCoau2M01 Gate3CC12 A1429 Gate4DF07 P05\_17  
45 | H-pAR610 pAR860 pAR959 **JESPR001** E5M5\_280  
46 | HBNL3798 TMB1645 pAR03\_37 pAR377 PVNC304  
47 | H-CLU328 **CG25**  
48 | H-ETM15-500 Gate1BF05  
49 | **A1432** pAR10C12 pGH777 pVNC173 PXP4\_49  
50 | HUnig25H06 NAU3498 Coau2C01  
51 | HNS535 Unig26C11 TMB1934  
52 | -NAU0812  
53 | HCLU896 PVNC060 Coau1F14 PVNC052  
54 | HNAU0986 BNL3346  
55 | -CLU1619  
56 | -Coau3C10  
57 | H-CIR168 **CLU2**  
58 | H-TMB2527 **JESPR204**  
59 | **CLU3894** **NAU3096**  
60 | -CLU152  
61 | HBNL2786 CLU4175  
62 | HUCcot10493\_151 BNL3401  
63 | **CLU2** **CLU3419**  
64 | H-A147 TMB0923  
65 | H-M16\_118 **NAU5489**  
66 | H-G1025 Unig27A04 HAU1976  
67 | -GH447  
68 | HPAR04B06 TMB1282  
69 | H-TME20-105 A1341 A1701 Gate3AH07  
70 | HNAU2629 Unig27G01 NAU3698 DPL0143  
71 | H-TMB0131 pGH391 CG13 **BNL3611**  
72 | HUnig28A09 A1378 CLU194 pGH215 HAU1446  
73 | -TMB1469  
74 | H-TMB0865 HAU3366  
75 | **BNL1878** **DPL0309** CLU26 Unig26F11 **NAU0911**  
76 | H-CIR240 BNL2448  
77 | **JESPR134** G1219 NAU2874 HAU1185 pAR01A07  
78 | HCLU1882 **BNL3811**  
79 | HBNL0390 pAR888 BNL3048 **CLU2615** **BNL3602**  
80 | HBNL137 NAU6406 DPL0071 GHNL P  
81 | **NAU6619** NAU3252 DPL0212 **NAU3253** GhAnn1  
82 | BNL4078  
83 | HCLU4877 M16\_150 pAR125 **BNL3875** CLU886  
84 | H-CIR082 CLU113  
85 | H-C105 pAR264 CLU564 **NAU5005** MGHE540  
86 | -CIR152  
87 | H-NAU3654 Unig26B10 Unig26C03  
88 | -E6M6-210  
89 | -NAU2980  
90 | H-CLU827 PVNC061  
91 | -PVNC047  
92 | H-MGHES300 BNL4096 CLU2063 A1778 PVNC416  
93 | H-P05\_14 **NAU2959** NAU5486 **CLU4357**  
94 | HNAU1952 **BNL3817** HAU3001  
95 | HCoau2E09 Gate3BF12  
96 | HNAU0420 pAR01D02 JESPR230  
97 | HGate2A02 pAR335 Unig28E09 NAU3138  
98 | H-CIR149 **BNL3903** **pGH429**  
99 | HNAU6465 pAR947 HAU2008 NAU2944  
100 | H-DPL0898 A1318 pAR398 **CLU2534** CLU1334  
101 | HPAR988 G1119 **CLU324**  
102 | HBNL0852 LGA22 pAR432 CIR024  
103 | H-M16\_002 pAR940 NAU495 pAR\_C\_20 NAU3674  
104 | HPAR406 TMB1615 Gate1DA06 Gate2BC05  
105 | HBNL3569 CIR219 TMC005 **TMB0189** **CIR139**  
106 | H-G1228 CLU82  
107 | HBNL0852 Coau1F22 pAR\_C\_06 Unig27G09 **DPL0444**  
108 | HCLU230 **CLU216**  
109 | HNAU1221 NAU0828 NAU0797 GH153-390 Gate3CC07  
110 | HCoau2C11 G1086 **CLU2054** **BNL3029** Y1446  
111 | H-CLU4282 **NAU5447** NAU2380  
112 | H-TMC05-200 HAU2783 A1751  
113 | -CLU2136  
114 | HNAU2708 **NAU3935** TMB1750  
115 | -Gate2CB01  
116 | HNAU3110 NAU3237 BNL3492 **CLU216**  
117 | HBNL0285 **BNL1611** pAR09B07  
118 | H-GH229 **BNL1690**  
119 | -CIR229  
120 | HCLU2943 **JESPR181**  
121 | -JESPR053  
122 | HUCcot10108\_132 **DPL0169**  
123 | HUnig23D12 GH459  
124 | -Unig23D12  
125 | H-CLU183 DPL0056 Gate22M15 Gate1BC02 **BNL4071**  
126 | **CIR176**  
127 | HPAR19 HAU0216 Gate2B-05 GH071  
128 | H-E42M4-M287.2  
129 | HHAU2112 P01\_33 JESPR045  
130 | -pAR157  
131 | -CG25  
132 | -DPL0594  
133 | HPAR278 Y2446  
134 | H-NAU3372 pAR597  
135 | -pVNC128  
136 | HCLU1868 pAR03B09 pAR825 pAR01\_52 **pAR01F05**  
137 | HPAR954 Unig22D05 Gate1BB10 P03\_04  
138 | H-G1180 G1112 Unig27H11  
139 | HGateNA02 P02\_09 CLU722  
140 | **BNL2745**  
141 | -pAR01E01  
142 | HNAU2655 CIR086  
143 | -pAR01A01  
144 | -GH073  
145 | HGate1CC05 pAR482 **BNL3020** NAU2604  
146 | HNAU2816 Gate2BF02 M16\_045 pAR060 pAR065  
147 | HPAR160 pAR169 NAU2642 **NAU4894**  
148 | -CLU693  
149 | H-CLU37 TMB1548  
150 | H-DPL0140 GHGLP1-250 Unig22B08  
151 | HCLU3232 HAU0112  
152 | -CLU3867  
153 | HNAU0117 A1259 **NAU3012** HAU0111 HAU1094  
154 | HNAU2846 **BNL1075**  
155 | H-CLU3002 pAR998  
156 | -CLU267  
157 | -A1567  
158 | HGH489 GH037 NAU3826 P02\_03 pGH225  
159 | H-TMB0835 CIR242 TMB1418  
160 | H-NAU3405  
161 | H-DPL0247 **CLU2067** A1569 P09\_32 P13\_06  
162 | HPAR03G11  
163 | H-CIR224 **NAU3092**  
164 | HBNL2865 E4M3\_272 NAU3024  
165 | HPAR04\_32 Gate2BG07 NBS808 Unig24H03 NAU4092  
166 | H-GH182 HAU0139 **BNL3043**  
167 | HNAU1605 GH567 **JESPR122**  
168 | -CLU1042  
169 | HGate2BG07 pGH474 NAU3609  
170 | -DPL0792  
171 | -CLU3946  
172 | H-GHGLP1-280  
173 | -CLU117

# c20

|     |                                                              |
|-----|--------------------------------------------------------------|
| 0   | HAU1222                                                      |
| 12  | E3M2_172                                                     |
| 20  | E3M2_174 MUSB1048                                            |
| 21  | CLU3831                                                      |
| 22  | BNLles E6M4_148                                              |
| 24  | pAR06G09 <b>BNL2553</b> P12_19 DPL0600                       |
| 25  | <b>BNL3646</b> E4M3_108                                      |
| 27  | E43M4-M102.9                                                 |
| 28  | HAU1267 <b>CLU232</b>                                        |
| 30  | G1104 Unig23E04 OD3OD22-205                                  |
| 31  | Gh277                                                        |
| 32  | G1237                                                        |
| 33  | Gate4AF02                                                    |
| 34  | DPL0350                                                      |
| 35  | <b>CLU3831</b>                                               |
| 37  | <b>Gh428</b>                                                 |
| 38  | <b>BNL3280</b> Coau2104 CLU2173 NAU1169                      |
| 39  | <b>NAU3368</b> NAU6463 NAU6448                               |
| 40  | <b>NAU6512 NAU6305</b> NAU6449 NAU6500 <b>NAU6179</b>        |
| 41  | <b>NAU6562</b>                                               |
| 43  | <b>NAU4881 JESPR190</b>                                      |
| 44  | pAR04A09 NAU2888                                             |
| 45  | MUSS271 Gate3BD01                                            |
| 46  | <b>CLU2198</b>                                               |
| 47  | Coau1F04 G1115 <b>Gate1BH09</b> P12_13                       |
| 47  | NAU3137                                                      |
| 48  | MUSB1304                                                     |
| 49  | TMB0272                                                      |
| 50  | G1218 <b>CLU1</b>                                            |
| 51  | UCcot10393_208 CLU1226                                       |
| 54  | HAU0685                                                      |
| 55  | CLU2533                                                      |
| 56  | HAU2991 Unig26G09                                            |
| 58  | HAU1459 Coau2O08                                             |
| 60  | CLU11 NAU1208                                                |
| 61  | <b>MUSS096</b>                                               |
| 62  | Gate4BC02 <b>pAR827</b> HAU0590                              |
| 63  | Gh048 CIR340                                                 |
| 64  | NAU2971 NAU6360 <b>NAU6495</b>                               |
| 65  | <b>CLU171</b> CIR020                                         |
| 66  | DPL0442                                                      |
| 67  | <b>CM45</b> pAR09D03                                         |
| 68  | HAU0922 Gate1DG09                                            |
| 69  | <b>CLU156</b>                                                |
| 70  | UCog10021_385 <b>NAU3368</b> BNL4035 Gate1BC08 Gate1CA06     |
| 70  | Gate3BB06 pGH700 PXP4_15                                     |
| 71  | <b>BNL0169</b>                                               |
| 72  | TMB0161 E3M54-M69.0 E31M55-M132.9                            |
| 73  | CIR166 HAU0230 CLU203                                        |
| 74  | E31M7-M191.2 <b>Gate1BH09</b> PXP4_75                        |
| 75  | MUSS279 <b>CLU31</b> pAR956 Unig26B03                        |
| 76  | <b>CLU31</b> NAU3122 <b>CIR043</b> G1261 PXP4_66             |
| 76  | Unig06E10 TMB1313                                            |
| 77  | CIR080 <b>BNL0119</b> TMB0987 TW14 HAU1532                   |
| 77  | CLU3854 <b>DPL0225</b> HAU2508 TMB1420                       |
| 78  | TML05-280 HAU3156 <b>A1695</b> Gate4CF10 E41M4-M97.1         |
| 78  | HAU3385 <b>TMB0317</b> NAU3873 E42M2-M140.5 NAU2869          |
| 78  | E31M53-M131.0                                                |
| 79  | TMB1125 E6M5_78 TMF09-200 <b>CLU3400</b> TMB1629             |
| 79  | CIR171 <b>NAU6667</b> NAU6215 NAU6476 <b>NAU3665</b>         |
| 80  | Gate4BD12 pGH439 <b>CLU1225</b>                              |
| 80  | NAU6515 TMF009 NAU6219 <b>CLU2198 NAU6269</b>                |
| 81  | <b>BNL3993</b> NAU6260 TMB1831 E1M51-M258.0 E8M8_102         |
| 81  | E31M55-M264.9 JESPR056                                       |
| 82  | NAU2915 <b>CLU3956</b> UCcot10066_289 MUCS332 <b>NAU2579</b> |
| 82  | BNL3670 <b>NAU6365</b>                                       |
| 83  | <b>CLU101</b> GW36-165 CLU1392 MUSB0831 MUSS319              |
| 83  | <b>JESPR171 CLU131</b> CM160 NAU3907 CLU1212                 |
| 83  | <b>CIR063</b> DPL0135                                        |
| 84  | CLU2838 <b>BNL0946</b> MUSB0319 Gate3BD09 Gate4AF01          |
| 84  | Unig23D03                                                    |
| 85  | Gh119 <b>BNL3660</b> Gh564 TMJ18-350                         |
| 86  | JESPR007 <b>CLU263</b> A1131 <b>BNL3379</b> Gate3CF10        |
| 86  | P05_57 pAR891 pVNC163 Unig23F01 Unig24E01                    |
| 87  | CLU2940 BNL0394 CG26                                         |
| 88  | <b>Gh236</b>                                                 |
| 89  | TMB0281 TMB0889 TMB0443 TMB0437                              |
| 90  | <b>BNL3948 CIR305</b>                                        |
| 91  | HAU3201 TMB0858 TMB0812                                      |
| 92  | NAU1005 At24                                                 |
| 94  | <b>JESPR006</b>                                              |
| 95  | BNL1253 BNL2689 A1682                                        |
| 96  | W03 JESPR167                                                 |
| 98  | Y4020-430 <b>NAU6693</b> DOW061 <b>CLU1675</b>               |
| 99  | <b>NAU3531</b> JESPR261 CLU1194                              |
| 100 | <b>CLU245 CLU897</b>                                         |
| 101 | NAU0904 <b>A1212</b> pAR850 pGH298                           |
| 102 | <b>NAU3434</b> CLU2114 E1M6_149 NAU4973 <b>BNL3838</b>       |
| 103 | <b>CIR121</b> NAU6465 STV100                                 |
| 104 | A1548 Gate1DF08 Gate2DF07 Gate4DH08 pAR946                   |
| 104 | pGH270 Unig22B09 E4M5_159 NAU6601 E4M2_350                   |
| 105 | MUSS070                                                      |
| 106 | BNL2641 E4M5_350 <b>CLU2073</b>                              |
| 107 | Gate3BF11 pGH384 NAU0853                                     |
| 108 | NAU3070 HAU2825                                              |
| 109 | E1M5_175                                                     |
| 110 | TMB0823                                                      |
| 111 | g073a03a Coau2G20                                            |
| 112 | CLU1462 E2M6_257 A1286 A1461 Gate3DD01                       |
| 113 | pGH214 pGH404 pGH418                                         |
| 113 | E1M6-380                                                     |
| 114 | pAR01D04                                                     |
| 115 | <b>BNL2570</b> Gate1AB02 Gate4AG08                           |
| 116 | Y1351-500                                                    |
| 117 | TMB1630 HAU1969 NAU0440                                      |
| 118 | DPL0486 CLU3598                                              |
| 120 | DPL0296 <b>NAU3407</b>                                       |
| 121 | NAU4880 CLU712 <b>BNL1145</b>                                |
| 122 | CLU1746                                                      |
| 123 | G1257 Gafb28K14 Gate4BA10 NAU3682                            |
| 124 | <b>MUSB0338 NAU2017</b> A1163 pGH295                         |
| 125 | HAU3101                                                      |
| 126 | <b>CLU210</b>                                                |
| 127 | <b>NAU4071</b>                                               |
| 128 | HAU2225 CLU1380                                              |
| 131 | CLU4529 Unig23B04 Unig26D08                                  |
| 132 | <b>NAU5307</b> E2M3_292                                      |
| 133 | NAU2544                                                      |
| 134 | NAU2540 NAU2543 NAU2549                                      |
| 135 | A1158 <b>Gate2AF06</b> Gate4CA05 Y2046                       |
| 136 | P05_61                                                       |
| 138 | <b>CLU2756 Gate2AF06</b> pGH486                              |
| 140 | <b>BNL3482</b> CIR094                                        |
| 141 | Gate1DG04                                                    |
| 143 | <b>STV031</b>                                                |
| 145 | pVNC024 DPL0317                                              |
| 146 | NAU2776                                                      |
| 149 | A1758 TMB0999 <b>pAR468 CLU3936</b>                          |
| 150 | CLU77                                                        |
| 151 | Gate2BA04 P06_57                                             |
| 153 | DOW059                                                       |
| 154 | <b>CMS21</b>                                                 |
| 158 | NAU0453                                                      |
| 168 | A1214                                                        |

# c21

0 BNL1655  
7 NAU3748  
8 NAU2653  
9 NAU3377  
12 CLU1944  
13 CLU4620  
16 MUSS532 CLU113  
25 DPL0193  
26 TMB1402  
29 CLU189  
35 BNL1705 BNL0197  
36 NAU3895  
37 TMB1493  
42 HA1214 Unig22G07  
44 CLU705 P06\_57  
46 P02\_45  
47 NAU3341  
48 GH301  
50 HA1346 pGH843  
52 HCLU5481 Coau3N02 pAR650 Unig24G08  
54 CIR254  
55 Gate3DH07  
57 pAR922  
58 CG17 CIR156  
60 HCLU836 MUSB1197  
62 HCLU369 CLU4321 CIR013  
65 DPL0582  
67 DPL0777  
69 HDOW092 CLU1619  
70 JA1531 pAR570 pAR144 P01\_42 pAR108  
71 IW06  
73 HCLU1057 NAU3731  
75 BNL1034  
76 pAR260 pAR08B09  
77 Gate1BF07 TMB2760  
78 E1M6\_440 CLU4264  
79 HAU1016 A1759  
80 NAU3853 NAU3381 DPL0062 G1020 Gate2CA09  
81 E8M4\_420 Gate3BB01  
82 Coau2C24  
83 HAU0720 BNL3147 BNL3935 G1261 P10\_56  
84 pAR04\_34 Unig06E08 TMB1642 NAU3481  
85 BNL3449 M16\_091 pAR708 Gate4DC05 Unig24B07  
86 Gate1BA07 Unig06C04  
87 Gate2AC02 P07\_04  
88 BNL3171 G1230 pAR944 pGH436 E6M5-260  
89 CIR051  
90 DPL0050  
91 Unig23D11 TMB2281 E4M15-110  
92 GH523 Coau2E13 Coau3B23 pAR636 pAR163  
93 P13\_07  
94 JA1684 Coau2G11 Gate4CC04 pAR843 pVNC248  
95 DOW051 BNL1681  
96 JA1413 Gate4DA04 DPL0181 CLU11 TMB0043  
97 TMA012 BNL1492 CIR385  
98 NAU3265  
99 JESPR158 NAU2141 HAU2442  
100 JESPR154 CIR275 NAU2826 NAU6222 NAU6627  
101 NAU3585 Unig25H02 CLU1356 BNL2812  
102 JESPR135 BNL1053  
103 MUSB0810  
104 CLU1300  
105 pAR966  
106 UCeg10306\_577  
107 Gafb2211  
108 Gate3CH01 pGH505 Unig25G01  
109 BNL1681 A1190 Coau2C15 CM23 NAU3657  
110 Gate3CH01  
111 Y12782 CLU4145 CLU198 Coau2D20 UCD221  
112 HHAU3074 A1400  
113 CLU337 pAR024 pAR178 pAR319 Gate1DG01  
114 pAR07E12 E3M1\_292 HAU2026  
115 Unig24A10 TMB1264 BNL1053 CG11  
116 JESPR251 NAU5301 NAU4855 M16\_198 Unig24A10  
117 HHAU2044 DPL0528  
118 DC1SA14-140  
119 Y4020-245 TMB1232  
120 HA1174 Gate2BE04  
121 CLU1585 NAU2950 E43M52-M336.9 NAU5212 NAU6334  
122 CIR061 BNL2741 NAU4039 BNL1580 HAU3047  
123 HAU1805 CLU1585 NAU3354 HAU3303  
124 emSDC1-425 MUCS347 NAU6178 CLU24 NAU6594  
125 NAU6444 CLU604 TMB2038 CLU131 CLU997  
126 MUSB0641 Coau2M09 Coau2M19  
127 BNL3987 MUSB0953 CLU4169 JESPR245 TMB1262  
128 HAU1311  
129 CLU1420 MUSB0849  
130 pAR451 NAU2361 Coau4D17  
131 em6GA28-150 TMB1998 DOW015 E31M53-M66.1  
132 pAR038 E1M4-M-525.2 CLU115 CMS46 E31M55-M456.8  
133 MUSB0923 Gate1DG09 BNL2805  
134 Gate2DC04 pAR537 BNL1403 CG17 BNL0137  
135 E3M52-M138.4 DC1SA21-210 E2M7\_120 em6PM8-255  
136 A1660 Unig24E10 BNL2895 E43M54-M125.4 CLU3639  
137 CLU5637 CG20 TMB0985 JESPR118 TMG06-180  
138 TMG006 CIR061 TMB0400 CG20 CIR408  
139 pXP3\_26 NAU6282 NAU6289 UCcol10558\_399 CIR068  
140 NAU6224 TMB0426 TMB0628 DPL0215 BNL3598  
141 pAR785 NAU6146 TMB2931 TMB2919 Gh498  
142 A1296 pBAM291 pGH854 PXP3\_26 HAU0684  
143 CLU5648  
144 NAU4004 TMB1976 Gate4AC11 pAR003 pAR535  
145 Unig28A12 CM160 E31M7-M345.6  
146 CIR122 NAU6600 Gate4DF12 Unig27D07  
147 E2M5\_350 CLU5488 pAR09B03 pAR08C01 DOW022  
148 E31M2-M367.1 E3M2\_198 pAR099  
149 HCLU1153 CLU1259 HAU1794  
150 JESPR238 NAU2877 Unig28E02 TMB1276  
151 CLU535 NAU6128 CM160 BNL1408 NAU4026  
152 pGH322 pVNC180  
153 NAU6524  
154 HCLU1383 HAU2116 CLU116 E3M4\_275 BNL3649  
155 DPL0228 E4M2\_192 NAU3889 E31M7-M311.3 HAU3394  
156 JESPR029 BNL4011  
157 BNL1551 NAU5091 CLU1550  
158 CLU1605 NAU0984 E7M2\_190 CLU1276 NAU3493  
159 T1MP20-200 me3DC1-720 M16\_040  
160 Gate4DC07  
161 MUSB0953 BNL1154 CLU240 P10\_10 pAR110  
162 pGH745  
163 Gh133 NAU0486 TMB1871 Gate3BB09 pAR03A11  
164 pAR921 pGH743 NAU6315 E31M53-M256.8  
165 MEBGA18-170 BNL3279 A1316 Gate1AG01 Gate4BF01  
166 Unig22F12 Unig22H11  
167 BNL1231 Gafb14F08 Gate4BD02 pVNC012 CLU2862  
168 NAU6267 E3M54-M85.6 NAU6431  
169 BNL0836 Gh288 NAU6675 NAU6520 NAU6593  
170 HAU6987  
171 NAU6530 E3M52-M144.3 NAU6658 CIR077 pAR566  
172 pAR576 pGH767 CLU3837  
173 Gate4CD11 pAR044 pAR073 pAR101 Unig22D03  
174 CG12  
175 BNL2662  
176 Hme1SA9-140 CLU400  
177 NBS008 pAR286 CM140  
178 E7M5\_102 CIR196 CLU2046  
179 NAU0429  
180 HCLU1920 CLU1838  
181 JESPR065  
182 NAU6525  
183 CIR316  
184 DPL0475  
185 HAU1592 CIR069  
186 HCLU64 CLU4136 TMH05-450 BNL3402  
187 HAU1809 TMB0879  
188 CLU25  
189 BNL2681  
190 NAU3415  
191 HCG22 DPL0376  
192 HAU2559  
193 LTCOL

# c22

|     |                                                                     |
|-----|---------------------------------------------------------------------|
| 0   | Gate1CB01 E7M2_166                                                  |
| 2   | Gate4DC01                                                           |
| 4   | Gate4CG07                                                           |
| 8   | pBAM291                                                             |
| 9   | HAU3261                                                             |
| 10  | PVNC311                                                             |
| 16  | NAU2634                                                             |
| 19  | CLU906 Unig22C05                                                    |
| 20  | <b>CLU90</b>                                                        |
| 22  | Y1340-230                                                           |
| 25  | <b>BNL4030</b>                                                      |
| 26  | pAR04H06 pAR08D12 <b>CLU3821</b>                                    |
| 27  | CLU839 <b>BNL4092</b> NAU2795                                       |
| 28  | DPL0722 <b>CLU4591</b>                                              |
| 29  | A1528                                                               |
| 31  | <b>BNL0448</b>                                                      |
| 32  | PXP3_60 Gh641                                                       |
| 33  | pAR04_22 <b>JESPR065</b>                                            |
| 34  | pAR977 pARC_14 HAU1527                                              |
| 35  | pAR643 NAU3557 E43M54-M176.2 pAR023 E6M8_88                         |
| 36  | A1618 HAU2691                                                       |
| 37  | JESPR050 BNL3945                                                    |
| 38  | <b>CLU819</b> CLU4481 pAR078                                        |
| 39  | NAU6109 Gh591                                                       |
| 40  | CG18 EM1OD32-130                                                    |
| 41  | Gh052 Gh200 Gate1CH01 Gate2BG01 Gate4BA04                           |
| 42  | NAU3508 NAU2376 <b>CLU3925</b>                                      |
| 43  | CLU759 JESPR063                                                     |
| 44  | pAR10G09 pGH272 NAU4062 CLU107 NAU6240                              |
| 44  | E6M8_162                                                            |
| 45  | <b>NAU2945</b> CIR294 Y12912 CG01 CLU252                            |
| 45  | CLU4466                                                             |
| 46  | E4M5_75 <b>JESPR184</b> Gate2BB08 pAR144 <b>pAR206</b>              |
| 46  | <b>NAU2302</b> A1459 <b>A1535 Unig26B02</b> Gh012                   |
| 47  | MUCS558                                                             |
| 47  | BNL2664 <b>MUSB1093</b>                                             |
| 48  | E3M6_291 MUSB0641 BNL3849 <b>NAU2945</b> A1619                      |
| 48  | BNL1673 <b>Unig26B02</b>                                            |
| 49  | E43M4-M386.5 E43M54-M128.6 <b>CLU4431</b> E43M2-M105.4 E3M52-M159.7 |
| 49  | <b>JESPR230</b> E31M53-M148.8 <b>NAU5046</b> E1M54-M102.5 CLU1540   |
| 49  | E1M1_171 DPL0389 Gate4AE10 pAR08H07 TME18-160                       |
| 50  | UCcg10178_356 E1M51-M229.9 E43M2-M154.7 Coau1J04 BNL3401            |
| 50  | BNL4088 UCcot10452_350 Gate4CA09                                    |
| 51  | E2M6_192 <b>BNL0206</b> BNL3881 CLU22 <b>NAU3514</b>                |
| 51  | <b>DPL0489</b> BNL4015 MUSS027 TMB0086 MUCS271                      |
| 51  | Y1022 TMB0120 DPL0196 <b>NAU3942 BNL3994</b>                        |
| 52  | <b>CIR172 CLU1338</b> CLU4186 <b>NAU3103</b> NAU6166                |
| 52  | CLU4121                                                             |
| 53  | NAU3138 NAU6286 <b>NAU2783</b>                                      |
| 54  | BNL3368 <b>NAU6237 CLU1338</b> Gate4AD10 <b>pAR711</b>              |
| 54  | <b>NAU6578</b> DOW070                                               |
| 55  | NAU2471 <b>NAU3824</b> Y1318-600 CLU14 <b>NAU5099</b>               |
| 56  | <b>MUSB1050</b> NAU3323                                             |
| 57  | E43M53-M-541.5 E1M2-M80.5 TMB1919 CLU5 Gate4CA01                    |
| 57  | pAR04_48 pVNC146                                                    |
| 58  | E42M2-M219.7 CLU156 CLU197 E3M4-M77.9                               |
| 59  | <b>CIR048</b> em5DC1-505 TMB0446                                    |
| 60  | me4OD26-205 <b>Gate4CG05</b> pAR043 pAR986                          |
| 61  | DC1SA18-205 <b>CLU6</b> Gate3DE03 CIR224                            |
| 62  | Gate2CC07 ME8GA5-130 BNL2771 HAU2206                                |
| 63  | <b>Gate4CG05</b> E41M1-M243.0 BNL3324                               |
| 65  | HAU0938 JESPR006 BNL0530                                            |
| 66  | NAU2363 E42M2-M145.1 A1184                                          |
| 68  | HAU1790 BNL3955 Gate1BA05 BNL2527                                   |
| 69  | Gate1DG02 <b>CIR036</b>                                             |
| 70  | <b>BNL0358</b> CIR183 NAU3546                                       |
| 71  | E6M7_167 E12M13-240 <b>BNL4049</b> EM1OD12-130 CLU1794              |
| 71  | Y4016-200 <b>BNL4049</b> TW1 <b>G1058</b> Unig22C01                 |
| 72  | Unig26F05                                                           |
| 73  | Gate3DG11 pAR138                                                    |
| 74  | Gate4BD10                                                           |
| 75  | STV112 Unig06D11                                                    |
| 76  | CLU702                                                              |
| 77  | CLU743 <b>HAU0086</b>                                               |
| 78  | <b>BNL4030 CLU3843 CLU619</b> HAU0087 UCD120                        |
| 78  | UCD216 UCD108                                                       |
| 79  | HAU3012 E8M1_240                                                    |
| 80  | Gate1AA05                                                           |
| 81  | CLU4363 pAR01_06                                                    |
| 83  | pAR07F11 MUSS343                                                    |
| 84  | Gh330 E43M54-M171.3                                                 |
| 85  | pGH286                                                              |
| 86  | NAU3868                                                             |
| 88  | <b>MUSB1112 CLU886</b>                                              |
| 89  | CIR122                                                              |
| 90  | Gh152                                                               |
| 91  | Gate1CD11                                                           |
| 92  | <b>JESPR220</b>                                                     |
| 96  | <b>BNL3873</b>                                                      |
| 97  | <b>CLU864</b> CLU3247 <b>TMB1648</b>                                |
| 98  | <b>CIR218 NAU3791</b>                                               |
| 99  | BNL1403                                                             |
| 102 | <b>CLU3516</b> CLU3877                                              |
| 107 | NAU0476                                                             |
| 108 | <b>CLU864</b>                                                       |

# c23

|     |                                                                |
|-----|----------------------------------------------------------------|
| 0   | G1074                                                          |
| 1   | Unig06B07 G1128 Gate1CC04 pVNC027 R45s                         |
| 4   | Gate4DG03                                                      |
| 12  | coau3L05                                                       |
| 17  | <b>NAU3100</b>                                                 |
| 22  | NAU3868                                                        |
| 25  | Gate3BE06 Gate3CB01 <b>Unig23G12</b>                           |
| 28  | Gate4AH01 <b>Unig23G12</b> Unig24F05 E4M5_228                  |
| 29  | CIR198 <b>CLU2941</b>                                          |
| 31  | HAU2382                                                        |
| 32  | NAU2771                                                        |
| 33  | Gate1AH08 <b>pAR497 CIR286</b> CLU3355 <b>BNL0686</b>          |
| 34  | UCoot10422_107 NAU3214                                         |
| 35  | <b>NAU3100</b> NAU3972                                         |
| 38  | W05                                                            |
| 40  | <b>CLU1724</b> pAR01B05                                        |
| 41  | pVNC121 CLU941 HAU2496 <b>NAU3888</b>                          |
| 43  | MUSS300 <b>pAR497</b>                                          |
| 48  | <b>CLU5695</b>                                                 |
| 49  | <b>CLU10</b> A1737                                             |
| 50  | <b>NAU6701</b> CG13                                            |
| 51  | TMB0670 <b>NAU3159</b>                                         |
| 52  | <b>TMB0157</b>                                                 |
| 53  | me1em6_290 Gate1AE12                                           |
| 54  | <b>BNL3383</b>                                                 |
| 56  | Gate3BE07                                                      |
| 57  | Y12922                                                         |
| 58  | Gate3BH06                                                      |
| 59  | TMB1769                                                        |
| 60  | NAU0424 NAU0423                                                |
| 61  | <b>CLU2041</b>                                                 |
| 62  | <b>MUSB0973 NAU6386</b> E2M6_94 <b>pAR547</b> Unig06D01        |
| 63  | <b>BNL2690 CIR019</b> CAC263 E41M1-M369.5                      |
| 64  | DC1SA14-155 E3M4_137 TMB1501 <b>BNL3823</b>                    |
| 65  | <b>NAU6323</b>                                                 |
| 66  | E2M6_265 E3M54-M128.8 MUSB0632 E3M52-M127.2 E43M54-M307.0      |
| 67  | MGHES116 <b>MGHES11 CIR060</b> E43M2-M183.9                    |
| 68  | <b>MUSB0641</b> JESPR013 me1em5-130 <b>CLU5695</b>             |
| 69  | <b>TMB0109 CLU98 CIR383</b> DPL0278 DPL0079                    |
| 68  | 5SrDNA BNL3903 <b>Coau1H02</b> Coau4J11 pAR04B01               |
| 69  | pAR257 <b>Unig27G07</b> NAU6136                                |
| 69  | TMB1701 <b>CLU306</b> E4M1_201 <b>NAU6130</b>                  |
| 70  | <b>JESPR274</b> NAU6279 NAU6508 NAU6517 <b>CLU1578</b>         |
| 70  | <b>NAU6138</b> NAU6564 <b>NAU6700</b> JESPR247 TMN07-200       |
| 70  | TMB0598                                                        |
| 71  | <b>JESPR151</b> JESPR167 <b>NAU3194</b> CLU1325 HAU1933        |
| 71  | Galb18L24 NAU2575 P02_37 NAU6676 CLU327                        |
| 72  | <b>NAU6581 TMB2901</b> UCoot10496_301 <b>CLU3861</b> HAU0045   |
| 72  | UCoot10496_192 TMB2943 <b>CLU4601</b> <b>Coau1H02</b> Coau2C12 |
| 72  | Galb23A18 Gate4CA02 P12_12 pAR01_33 <b>pAR127</b>              |
| 72  | pGH730 pVNC164 Unig22C04 Unig22F09 <b>Unig27G07</b>            |
| 73  | NAU3986 <b>MUSB1040</b> E8M8_350 E1M51-M131.4 <b>NAU2753</b>   |
| 73  | E5M3_330                                                       |
| 74  | Gh096                                                          |
| 75  | Coau2C14 Gate1AD04 Y1328-700 E6M4_97 MUSB1043                  |
| 76  | E8M5_293 CLU4882 em6PM8-225 E12M8-350                          |
| 77  | Gate3CG11 BNL2611                                              |
| 78  | DOW060 NAU5350                                                 |
| 79  | TMB2907 pAR083 pAR474                                          |
| 80  | <b>BNL3511</b>                                                 |
| 81  | CG01                                                           |
| 82  | <b>CLU15</b> Coau1H12                                          |
| 84  | <b>NAU3763</b>                                                 |
| 85  | CLU756                                                         |
| 86  | <b>CLU1724</b>                                                 |
| 87  | <b>NAU2567</b> CLU2646 Unig28D07                               |
| 89  | BNL2977                                                        |
| 90  | CIR359                                                         |
| 92  | <b>NAU2739</b>                                                 |
| 93  | <b>CLU33</b>                                                   |
| 94  | DC1SA21-300                                                    |
| 95  | CLU720                                                         |
| 96  | <b>A1270</b> Gate2BD10                                         |
| 97  | NAU2709                                                        |
| 98  | P03_23 pGH786                                                  |
| 99  | <b>NAU3967</b>                                                 |
| 101 | TMB0170 <b>CIR283</b>                                          |
| 102 | Gate2BB08 <b>DPL0378</b> CIR200 <b>BNL1579</b>                 |
| 103 | Gh498 Gate4BC12 Gate4BD06                                      |
| 104 | TMB0913 TMB0764                                                |
| 105 | HAU2140                                                        |
| 107 | <b>DPL0012 Gate4CA09</b> <b>BNL3140</b>                        |
| 108 | NAU0858                                                        |
| 109 | NAU2528 Coau1N16                                               |
| 110 | CLU2742 <b>NAU3655</b> BNL1648 At16 <b>JESPR248</b>            |
| 110 | <b>Gate4CA09</b>                                               |
| 111 | CIR044 <b>A1471</b> Coau2A01 G1267 pAR008                      |
| 112 | pGH783 HAU2553 <b>M16_125</b> TMB0382                          |
| 113 | PXP4_44                                                        |
| 114 | TMO06-190 CLU286                                               |
| 115 | E6M6_167 HAU2222                                               |
| 117 | NAU0936 Gh551 <b>CLU1396</b>                                   |
| 118 | CLU500 Gate1AA01 Gate4AA11                                     |
| 119 | UCD248 <b>Gate2BE06</b> HAU1572                                |
| 121 | A1606 NAU0799 HAU2158 NAU2803                                  |
| 122 | <b>A1517</b> NAU5494                                           |
| 123 | <b>BNL1030 BNL1414</b> <b>CLU1965</b> BNL1317 <b>CLU151</b>    |
| 123 | <b>TMB1758</b> MGHES02 MGHES06 <b>CLU181</b> DPL0307           |
| 124 | BNL2608 MUSS083 NAU3629 <b>BNL2590</b>                         |
| 125 | <b>Gate2BE06</b> CLU2077 <b>DPL0218</b> <b>JESPR114</b>        |
| 125 | NAU3966 HAU2517 <b>MUSS189</b> Gate3DA04                       |
| 126 | CIR194                                                         |
| 127 | CLU2088 Coau2A21 CLU1374                                       |
| 130 | <b>CLU3269</b>                                                 |
| 131 | pAR209 CLU3725                                                 |
| 133 | E5M1_110                                                       |
| 134 | CLU4356                                                        |
| 135 | NAU2873 <b>CLU2700</b>                                         |
| 136 | BNL0597 CIR061                                                 |
| 137 | CLU4100 <b>BNL4053</b>                                         |
| 138 | CLU939 pAR10G06 pAR279 DPL0699 <b>BNL3173</b>                  |
| 140 | Gate3CF09 UCcg11354_191                                        |
| 141 | UCcg11354_61                                                   |
| 142 | E7M1_238 DPL0530 Coau4K10                                      |
| 143 | <b>JESPR095</b>                                                |
| 144 | Gate1AA09 Gate4DB01                                            |
| 146 | BNL3985                                                        |
| 148 | <b>NAU0864</b>                                                 |
| 150 | MUCS072                                                        |
| 151 | E3M1_310                                                       |
| 163 | A1707 A1482                                                    |
| 167 | A1194 A1608 Gate3BF10 pAR704 pGH558                            |
| 171 | Gate2AA02 Gate4AE03                                            |

# c24

|     |                                                   |
|-----|---------------------------------------------------|
| 0   | CLU261                                            |
| 5   | BNL2597                                           |
| 16  | Coau2L09                                          |
| 18  | Gh167                                             |
| 20  | A1783 Coau1M19                                    |
| 21  | Gh325                                             |
| 24  | pAR01_03 CIR026 DPL0152 DPL0353                   |
| 25  | NAU3010                                           |
| 26  | NAU1017                                           |
| 27  | CIR388                                            |
| 28  | Gate2AA02 Gate2CA02 Gate3BF10 pAR503              |
| 30  | CLU764 CLU2061                                    |
| 33  | HAU1567                                           |
| 39  | CLU4310 Unig22C05                                 |
| 40  | JESPR302 JESPR308                                 |
| 41  | JESPR157                                          |
| 42  | pAR248                                            |
| 43  | NAU2407                                           |
| 44  | NAU2934                                           |
| 45  | HAU0761 CLU4158                                   |
| 46  | NAU3786 Unig23G01 CLU3913                         |
| 47  | CLU1505                                           |
| 49  | CLU4761 CLU1276                                   |
| 51  | BNL3860 Coau2E05 P05_04 P05_37                    |
| 52  | NAU1369                                           |
| 53  | Gate3CE04 BNL2835 CIR119 NAU4091                  |
| 54  | pVNC244                                           |
| 55  | HE5M1-M363.3 Gate2AC11 pAR571 pAR972              |
| 57  | DPL0461                                           |
| 59  | HE5M4_345 JESPR070 BNL1513                        |
| 60  | HAU1432                                           |
| 61  | CIR274 A1107 DPL0068                              |
| 62  | NAU1302                                           |
| 64  | G1074 Gate4AD12 TMB2386                           |
| 65  | NAU0478                                           |
| 66  | UCcg10596_89                                      |
| 67  | CIR354 NAU3424 CLU2089                            |
| 68  | CLU684                                            |
| 70  | NAU4099 NAU1302 NAU3201                           |
| 71  | JESPR305                                          |
| 72  | CLU112 BNL2961 Gate4BG06 NAU5399                  |
| 73  | Gate4AD12 pGH244 CLU2796                          |
| 74  | CLU527 NAU3424 NAU3605                            |
| 75  | Gh273 pAR476 pGH797 NAU2439 JESPR078              |
| 76  | NAU3562 CLU607 pAR09A08 pAR594 CLU4317            |
| 77  | NAU1197 HAU2738 Gate1DE02 pAR010 Rab11            |
| 78  | E1M3-M109.4 NAU2169 A1562 pAR785                  |
| 79  | NAU1505 DPL0031 pGH317 CLU113                     |
| 80  | JESPR291 Coau1E19 me3em2-175 BNL3638              |
| 81  | NAU0891                                           |
| 82  | HAU3247 CLU2762 HAU3293 CLU292 CLU1305            |
| 83  | TMD05-225                                         |
| 84  | CLU223 E3M2_420 CLU1476                           |
| 85  | HAU1846 CLU3977                                   |
| 86  | TMB0072                                           |
| 87  | CLU177 CLU1630 TMP14-240                          |
| 88  | TMB1639 CLU1048                                   |
| 89  | BNL3474 E43M52-M438.6 Gate4CF12                   |
| 90  | E3M5_184                                          |
| 91  | DPL0534 em5DC1-110                                |
| 92  | GW57-160                                          |
| 93  | GW58-160 DPL0202 HAU0722 TMB0429 Gate4DE09        |
| 94  | pAR07D04                                          |
| 95  | NAU2292 E41M1-M216.6 TMB1289                      |
| 96  | CIR061 BNL2568 CLU1339                            |
| 97  | Gate3DD06 NAU6310                                 |
| 98  | E7M11-150                                         |
| 99  | Gh128 E7M1_193 CLU1940 E43M52-M334.3              |
| 100 | Gate1DF03 Gate2CC12 Gate3DE09 Gate4BG11 NAU1531   |
| 101 | HAU2522                                           |
| 102 | NAU2240 BNL0387 CIR070                            |
| 103 | NAU6213 Gate1BG03 pAR07D04 NAU3773 CLU995         |
| 104 | NAU2631 NAU6642 E43M53-M57.8                      |
| 105 | NAU3954 CLU2660 E43M52-M373.0 CLU2934 NAU6235     |
| 106 | CLU1290 TML21-300                                 |
| 107 | NAU2619 JESPR033 NAU6616 BNL2499                  |
| 108 | CLU2834 BNL2655 CLU2116 TMA5-180 em1DC1-205       |
| 109 | NAU2926 GW34-305 Coau2A11 Gate4AH08 Unig27F10     |
| 110 | NAU6488 NAU6169 CLU4137 NAU3769 BNL3604           |
| 111 | CLU1261 NAU5335 EM1OD26-500 NAU6389 E43M54-M169.4 |
| 112 | GW17-350 CLU3611 BNL3474                          |
| 113 | Gh237 E42M1-M134.6 Gh272                          |
| 114 | E1M4-M238.3 HAU1533 DPL0228 CLU92 TMB0555         |
| 115 | TMB1182                                           |
| 116 | P10_56 pAR08F09 E6M5_350 TMB1244 DPL0231          |
| 117 | CIR289 DPL0146                                    |
| 118 | MUSB0632 A1667 Gate2CD01 Gate4AC08 pAR118         |
| 119 | pGH318 TMB1190 BNL1017 Gh171                      |
| 120 | E1M2-M378.1 MUSB0255 E6M5_237                     |
| 121 | MUSB0641 A1632 pAR418 pVNC164 BNL3084             |
| 122 | A1168 CM43 E4M7_134 A1590 G1013                   |
| 123 | Gate2CF02 P05_24 TMB0016                          |
| 124 | E4M3_94 CLU365 Gate1CC03 E43M2-M276.3 E3M2_245    |
| 125 | E31M7-M115.4 Gh573 NAU1262 A1662 E1M2_360         |
| 126 | E5M8_176 E3M7_360 Gate1DB08 pAR332 pAR418         |
| 127 | E7M4_287                                          |
| 128 | TMB1745                                           |
| 129 | CLU105 E42M2-M190.9                               |
| 130 | E2M6_77 CG03                                      |
| 131 | BNL0252                                           |
| 132 | BNL2582 NAU3667 NAU0435 CLU26 CLU3873             |
| 133 | DPL0604 NAU3910 A1348 Coau2C15 Gate1AG10          |
| 134 | pAR04_11 pAR09H09 pAR309                          |
| 135 | NAU3771                                           |
| 136 | E14M4-170                                         |
| 137 | E15M16-100 NAU1350 CIR278                         |
| 138 | NAU3455                                           |
| 139 | E1M2-320 CLU1261 G1010 MUSB0175 DC1OD8-250        |
| 140 | UCcg10011_47                                      |
| 141 | CLU2055                                           |
| 142 | CIR061                                            |
| 143 | CIR413                                            |
| 144 | CIR289                                            |
| 145 | BNL3627 Gate1CA10                                 |
| 146 | CLU113 CIR343 JESPR307                            |
| 147 | pAR789                                            |
| 148 | pAR03_23                                          |
| 149 | A1197 A1197 A1658                                 |
| 150 | NAU3904 P07_04 JESPR183                           |
| 151 | Gate2BC08 Unig23H12                               |
| 152 | pAR01A05                                          |
| 153 | NAU3324                                           |
| 154 | Gate3CA01 pARC_04                                 |
| 155 | Gate3CA01                                         |
| 156 | Gate4CB07                                         |
| 157 | G1276                                             |
| 158 | Gate3BE04 NAU3221                                 |
| 159 | A1611 pAR490                                      |
| 160 | Gate4DG08                                         |
| 161 | Y1187                                             |
| 162 | NAU3224                                           |



# c25

|     |                                                    |
|-----|----------------------------------------------------|
| 0   | E3M2_222                                           |
| 7   | A1214 pAR574 <b>Coau1G15</b>                       |
| 10  | Unig22A07                                          |
| 11  | Coau1G15                                           |
| 14  | HAU1324                                            |
| 15  | pAR415                                             |
| 18  | DPL0520                                            |
| 20  | TMB1740 Coau3C10                                   |
| 23  | NAU2773 TMB1448                                    |
| 25  | Gate4CE11 P01_34                                   |
| 27  | Unig24C12 Unig23A07                                |
| 28  | HAU0591                                            |
| 30  | Unig24C12                                          |
| 31  | BNL3594 E5M8_230 PVNC070 HAU1919                   |
| 32  | Coau2C07 pGH653                                    |
| 36  | pBAM325 DPL0365 CLU736 pAR04_44                    |
| 37  | NAU3677 pAR550                                     |
| 39  | pAR648                                             |
| 40  | Coau3L05 G1099 DPL0282                             |
| 45  | E5M15-300                                          |
| 49  | DOW090 Gate1DD01 pAR10B08 pAR145 pAR364            |
| 50  | pAR981                                             |
| 51  | CLU824                                             |
| 51  | pAR981                                             |
| 53  | Unig24E08 NAU1454                                  |
| 55  | CLU27 CIR338                                       |
| 58  | NAU1277                                            |
| 59  | NAU0927 NAU0928 CLU1552                            |
| 60  | G1161 Gate4CD01                                    |
| 61  | CIR268 Y1321-380                                   |
| 62  | E2M5_420 Unig25H10                                 |
| 63  | CLU3953 E11M15-110 DOW062                          |
| 64  | GhAGP CLU4242 E31M55-M58.1 BNL1417                 |
| 65  | Gafb24D05 Unig24E11 CLU1026 CLU1323 E3M5_400       |
| 66  | E42M4-M56.1                                        |
| 66  | E3M6_260                                           |
| 67  | pAR048 Y1325-1200                                  |
| 68  | CIR299 TMK19-200 E2M4_154                          |
| 69  | TMK22-185 DPL0799 BNL0150 CLU133 HAU1936           |
| 69  | CLU125                                             |
| 70  | ME8GA25-160 NAU0905 CIR150 CLU2763 CLU4169         |
| 71  | BNL3103 CLU3928                                    |
| 72  | E41M1-M329.2 Gh077 BNL1517 BNL3264 E1M54-M89.3     |
| 72  | E1M3-M175.6 E7M4_309                               |
| 73  | E1M51-M179.5 E6M5_240 MUCS337 NAU2687 E43M2-M445.4 |
| 73  | DPL0377 CLU1295 MUSB0641 E8M6_125 MUSB1035         |
| 73  | GW12-800 TMB0508 CIR407 BNL1169                    |
| 74  | NAU6136 HAU2625 E6M6_106 BNL3937 NAU6379           |
| 74  | TMB2898 NAU6271 NAU6398 DPL0301 CLU1335            |
| 74  | NAU6613 CLU3879 NAU6387 NAU6478 NAU6661            |
| 74  | TMB0436                                            |
| 75  | E5M1_176 NAU3588 TMG10-175 CLU338 E6M5_108         |
| 75  | CLU1145 CLU1274 CLU3942                            |
| 76  | NAU2838 HAU1774 HAU1783 CLU1396 CLU1560            |
| 77  | Gh515                                              |
| 77  | DPL0075 pAR783 DPL0519 PXP1_01                     |
| 78  | CIR287 A1742 P09_03 pAR897 Gate4CE02               |
| 78  | pAR06E02 pAR07B11 CLU4065 Gate2CA07 pAR893         |
| 79  | NAU6347 P02_16 P10_20 Gate2CG09                    |
| 79  | BNL1153 BNL3405 pAR396 JESPR273 NAU5373            |
| 80  | DPL0532                                            |
| 81  | MUCS340 MUSS327 NAU2119 BNL3538 DPL0239            |
| 82  | Gh220 em1DC1-250 BNL3903                           |
| 83  | CLU1678 TMB2811 NAU3171 DPL0067                    |
| 84  | BNL1440 Coau4H09                                   |
| 85  | Gate4AH08 DPL0323 NAU6588 UCD311 pGH309            |
| 86  | CG14 E1M3_285 TMB1583 CLU134 pGH691                |
| 86  | CLU133                                             |
| 87  | DPL0874 CIR413 BNL4100 NAU6441 E2M7_89             |
| 88  | Coau1L16                                           |
| 88  | DPL0284                                            |
| 89  | CG25 CLU149 BNL0272                                |
| 90  | A1550 G1262 PXP1_47 HAU0615 HAU3055                |
| 90  | BNL3806                                            |
| 91  | UCcg10175_267 TMB0313 Gh591 CLU373                 |
| 91  | HAU3157 Gafb08C24 NAU0783 NAU6573 NAU6588          |
| 93  | DOW036                                             |
| 94  | BNL3190                                            |
| 96  | CIR329 M16_119 Unig26G04                           |
| 97  | BNL3655 pAR792 Gh537 Gh100                         |
| 98  | CLU11 Gate1CA07 CLU761                             |
| 99  | MUSB0606 E43M2-M204.4                              |
| 100 | NAU3578                                            |
| 101 | CLU1678 CIR280 Gafb08C24 Unig26G04                 |
| 102 | em6GA30-255                                        |
| 103 | pAR969 pGH331 TMB0338                              |
| 104 | TMB0682 NAU6269                                    |
| 105 | EM2GA34-155                                        |
| 106 | CLU816                                             |
| 108 | CLU1403 E3M5_162                                   |
| 109 | NAU0905                                            |
| 110 | pAR01B03 TMB2377                                   |
| 112 | pAR026                                             |
| 113 | BNL1056                                            |
| 116 | CLU6                                               |
| 118 | CLU2631                                            |
| 120 | Unig06F04                                          |
| 121 | PXP4_18 pAR433 PXP3_56 CLU21                       |
| 122 | CLU6 Gate1CE02                                     |
| 123 | HAU2022                                            |
| 124 | Gate4BB01 BNL0827 BNL0584                          |
| 128 | BNL3436                                            |
| 130 | Unig25C07                                          |
| 131 | Gafb17H13                                          |
| 137 | BNL3359                                            |
| 138 | CLU63                                              |
| 139 | CIR298                                             |
| 140 | NAU1606                                            |
| 141 | CIR267                                             |
| 142 | NAU2713 CLU4097                                    |
| 143 | A1215 pAR366                                       |
| 145 | MUSS519                                            |
| 147 | coau3B05 PXP3_46                                   |
| 149 | Gate2CB08 pAR04_30 pAR237 E4M3_268                 |
| 150 | pAR070 pAR445                                      |
| 155 | Unig06D09                                          |

# c26

|     |                                                   |
|-----|---------------------------------------------------|
| 0   | NAU3862                                           |
| 4   | CIR170                                            |
| 6   | CLU1034                                           |
| 10  | M16_041                                           |
| 13  | CLU4602                                           |
| 15  | pAR177                                            |
| 16  | Gate4CF12                                         |
| 19  | G1045                                             |
| 24  | HAU1081                                           |
| 25  | HAU2902 Gate4AH02 pAR764                          |
| 27  | pAR03C01                                          |
| 28  | HAU3344 A1685 G1005 pVNC093                       |
| 29  | pGH331                                            |
| 30  | BNL2578                                           |
| 31  | NAU3862                                           |
| 32  | JESPR014                                          |
| 34  | A130 ME8GA5-225                                   |
| 36  | Unig24C07 Gh568                                   |
| 37  | DPL0866                                           |
| 38  | NAU1274 CLU4607                                   |
| 39  | pAR01D07                                          |
| 40  | CLU1608 NAU3865                                   |
| 41  | JESPR295 E10M3-190                                |
| 43  | CLU72 Gh055 me5OD12-270                           |
| 44  | NAU1039                                           |
| 45  | Coau2M07                                          |
| 46  | NAU1119 DOW088                                    |
| 47  | E2M11-200                                         |
| 49  | NAU6636                                           |
| 50  | NAU0877 NAU1119 CIR233                            |
| 51  | BNL2621 HAU1783                                   |
| 52  | E1M1_420 pAR218                                   |
| 54  | me2em2-100 CLU4150                                |
| 55  | DOW085 A1264 P09_03 pGH350 CLU132                 |
| 56  | HAU0915 DPL0039 E7M2_158 CM50                     |
| 57  | CIR235                                            |
| 58  | NAU6659 pAR984                                    |
| 59  | PGCT116 CLU1475 BNL3510 CLU4150 BNL0116           |
| 59  | JESPR092 BNL3435 CLU2262 HAU2587 CLU4202          |
| 59  | NAU4097 CIR143 E2M5_85 DPL0838                    |
| 60  | CLU1111 DPL0183 BNL3867 BNL0840 CMS37             |
| 60  | pGH737 pAR144 A1719 DPL0665 DPL0796               |
| 60  | DPL0391 Gafb22M15                                 |
| 61  | GW34-245 Gate3CG12 DPL0028 Gate4DB11 L712         |
| 61  | CLU677 pAR06E10                                   |
| 62  | NAU3647 NAU6161 CLU45 BNL3599                     |
| 63  | E8M2_173 NAU3189 NAU3442 A1524 G1212              |
| 64  | NAU3005 CIR039 CLU1638                            |
| 65  | E31M2-M151.9 BNL1227 CLU3376 Y1348-350            |
| 66  | HAU1452 E1M3-M209.2 E4M5_69 E43M3-M319.1 NAU3881  |
| 67  | E3M2-M116.2 Gate4AF08 Gate4DC07                   |
| 69  | Gh603 NAU0460                                     |
| 70  | MUSB0411 CLU2076                                  |
| 72  | BNL1669 E43M3-M358.8 Gate1CD11 Gate4AF05 pAR01_19 |
| 72  | pAR051 pAR354 PXP2_79 NAU5043 HAU1292             |
| 72  | HAU2243                                           |
| 74  | MUSS101 NAU3961                                   |
| 75  | E3M6_119                                          |
| 76  | pAR01C06                                          |
| 78  | DPL0770                                           |
| 79  | Y2583                                             |
| 82  | DC1SA21-160 DPL0285                               |
| 83  | DPL0598 pAR01_11                                  |
| 84  | Gh243                                             |
| 85  | MUSS439 CLU2064                                   |
| 86  | NAU3236                                           |
| 87  | CLU4648 NAU1463 CLU2737 CLU4172                   |
| 88  | CLU3941 pAR10F10 pAR563                           |
| 89  | E3M4-M91.6 HAU2027                                |
| 90  | CLU4602 NAU2615 BNL0341                           |
| 91  | NAU2750 A1453 P01_52                              |
| 92  | P10_66 P10_67 CLU4312                             |
| 93  | CLU692 A1776 pAR04A05 pAR07B02 pAR10F12           |
| 93  | E41M1-M315.4 gate2DG02                            |
| 94  | BNL2624 UCcg10190_179 pGH785 CIR085               |
| 95  | me4GA12-155 G1026 pAR054 E43M52-M239.1            |
| 96  | BNL2495 BNL3482                                   |
| 97  | E8M1_300 NAU2715                                  |
| 98  | Unig06C06                                         |
| 99  | CLU260 NAU2696                                    |
| 100 | pAR757 NAU3291                                    |
| 101 | CLU439 CLU3847                                    |
| 102 | pGH592 NAU5321 CLU341                             |
| 103 | NAU1231 Coau2O24 NAU3851 NAU1558                  |
| 104 | NAU3850 GW17-1400 Gate4CG06 UCcot10465_113        |
| 105 | NAU3713 G1061 CLU173 JESPR121 NAU3186             |
| 106 | TMB0083 A1210 G1203 CG15                          |
| 107 | G1155                                             |
| 108 | NAU6112 NAU3905 CLU1508 NAU3876 NAU6123           |
| 108 | BNL2725 pAR04_14 G1261 pGH329                     |
| 109 | MUCS289 Gafb11P04 TMB2748                         |
| 110 | E43M52-M105.5 NAU6099 E1M3-M463.1                 |
| 111 | CIR078 Unig06D12                                  |
| 112 | Unig28D04 pAR243                                  |
| 113 | BNL3537 Gate2BH08 pAR08H02 Unig06D12              |
| 114 | CLU2709 Y2478 Gate2DD07                           |
| 115 | Coau4G22                                          |
| 116 | CIR032 NAU2868                                    |
| 117 | pGH413 NAU3720                                    |
| 120 | A1310                                             |
| 121 | CLU1458 G1037 Gate2BG06                           |
| 122 | CLU5 CLU1371                                      |
| 123 | CLU2629 NAU3774 Gate4CA11 Unig28B06 NAU3305       |
| 125 | BNL2557                                           |
| 130 | BNL3994                                           |
| 131 | BNL3368 PXP1_73                                   |
| 132 | E43M52-M274.4                                     |
| 133 | CIR272                                            |
| 134 | DPL0886                                           |
| 135 | Coau2109 Unig22D07                                |
| 136 | E3M4_219                                          |
| 137 | NAU3032                                           |
| 139 | PXP2_75 Unig25H12                                 |
| 141 | NAU3896                                           |
| 142 | MUSS058 CLU2020                                   |
| 144 | pAR101 pAR807                                     |
| 145 | DPL0481                                           |
| 147 | NAU3465                                           |
| 148 | A1614                                             |
| 153 | CLU184                                            |
