# Supplementary material for: A High Density Consensus Genetic Map of Tetraploid Cotton That Integrates Multiple Component Maps through Molecular Marker Redundancy Check
Source: PLoS One. 2012 Sep 24;7(9):e45739. doi: 10.1371/journal.pone.0045739 (PMC3454346; doi:10.1371/journal.pone.0045739)
Supplement: Table S4 — Summary of molecular marker types, and identities, used in the construction of the HDC cotton map. (XLS) [file pone.0045739.s009.xls]

## Sheet: Supp_Table S4
Supplement Table S4. Summary of molecular marker types and their identities used in the construction of the cotton UDC map
prefix	marker type	No loci	origin
E_M_1)	AFLP	782	genomic
At	RFLP	11	other
A	RFLP	293	genomic
CMS	RFLP	19	genomic
Coau	RFLP	193	cDNA
EST	RFLP	9	cDNA
G	RFLP	119	genomic
Gafb	RFLP	39	cDNA
Gate	RFLP	594	cDNA
M	RFLP	24	genomic
NBS	RFLP	6	cDNA
P	RFLP	97	genomic
pAR	RFLP	674	cDNA
pBAM	RFLP	7	genomic
pGH	RFLP	150	genomic
pVNC	RFLP	55	genomic
pXP	RFLP	60	genomic
Unig	RFLP	308	cDNA
W	RFLP	11	cDNA
Uccg	SNP	160	cDNA
Ucot	SNP	47	cDNA
BNL	SSR	1609	genomic
CAC	SSR	5	other
CIR	SSR	617	genomic
CLU2)	SSR	(1953)	NA
CM	SSR	52	genomic
DOW	SSR	60	genomic
DPL	SSR	410	genomic
Gh	SSR	308	genomic
HAU	SSR	506	cDNA
JESPR	SSR	437	genomic
MGHES	SSR	67	cDNA
MUCS	SSR	130	cDNA
MUSB	SSR	229	genomic
MUSS	SSR	185	cDNA
NAU	SSR	2251	genomic+cDNA
NBRI	SSR	0	genomic+cDNA
STV	SSR	44	cDNA
TMA	SSR	4	genomic
TMB	SSR	427	genomic
TMC	SSR	2	genomic
UCD	SSR	28	cDNA
CG	SSR+RFLP	57	other
others	NA	354	NA
Total3)		11440
1)"_" denotes number
2) Cluster of sequence redundant SSR marker. Each cluster consists of between 2 and 14 SSR markers. Components of each cluster are listed in Table S1
3) 11440, as total of loci in original 6 component maps used for map integration, is different from 10330 total of loci in Table 1 as total of loci in original 6 maps after curating maps for inversions
